1

2

## The role of fibroblast growth factor signalling in *Echinococcus*

3

### *multilocularis* development and host-parasite interaction

4

5 Sabine Förster<sup>1</sup>, Uriel Koziol<sup>1,2</sup>, Tina Schäfer<sup>1</sup>, Raphael Duvoisin<sup>1</sup>, Katia Cailliau<sup>3</sup>, Mathieu  
6 Vanderstraete<sup>4</sup>, Colette Dissous<sup>4</sup>, and Klaus Brehm<sup>1\*</sup>

7

8 <sup>1</sup>University of Würzburg, Institute of Hygiene and Microbiology, Josef-Schneider-Strasse 2,  
9 D-97080 Würzburg, Germany

10 <sup>2</sup>Universidad de la República, Facultad de Ciencias, Sección Biología Celular, Montevideo,  
11 Uruguay

12 <sup>3</sup>CNRS UMR 8576, University of Lille, 59650, Villeneuve d'Asq, France

13 <sup>4</sup>Center for Infection and Immunology of Lille, Inserm U1019, CNRS-UMR 8204, University  
14 of Lille, Lille, France

15

16 **Short title:** Host FGF stimulates *Echinococcus* larval development

17

18 \*Corresponding author.

19 Email: [kbrehm@hygiene.uni-wuerzburg.de](mailto:kbrehm@hygiene.uni-wuerzburg.de) (KB)

20

## 21 **Abstract**

22 **Background:** Alveolar echinococcosis (AE) is a lethal zoonosis caused by the metacestode  
23 larva of the tapeworm *Echinococcus multilocularis*. The infection is characterized by tumour-  
24 like growth of the metacestode within the host liver, leading to extensive fibrosis and organ-  
25 failure. The molecular mechanisms of parasite organ tropism towards the liver and influences  
26 of liver cytokines and hormones on parasite development are little studied to date.

27 **Methodology/Principal findings:** We show that the *E. multilocularis* larval stage expresses  
28 three members of the fibroblast growth factor (FGF) receptor family with homology to human  
29 FGF receptors. Using the *Xenopus* expression system we demonstrate that all three  
30 *Echinococcus* FGF receptors are activated in response to human acidic and basic FGF, which  
31 are present in the liver. In all three cases, activation could be prevented by addition of the  
32 tyrosine kinase inhibitor BIBF 1120, which is used to treat human cancer. At physiological  
33 concentrations, acidic and basic FGF significantly stimulated the formation of metacestode  
34 vesicles from parasite stem cells *in vitro* and supported metacestode growth. Furthermore, the  
35 parasite's mitogen activated protein kinase signalling system was stimulated upon addition of  
36 human FGF. The survival of metacestode vesicles and parasite stem cells were drastically  
37 affected *in vitro* in the presence of BIBF 1120.

38 **Conclusions/Significance:** Our data indicate that mammalian FGF, which is present in the  
39 liver and upregulated during fibrosis, supports the establishment of the *Echinococcus*  
40 metacestode during AE by acting on an evolutionarily conserved parasite FGF signalling  
41 system. These data are valuable for understanding molecular mechanisms of organ tropism  
42 and host-parasite interaction in AE. Furthermore, our data indicate that the parasite's FGF  
43 signalling systems are promising targets for the development of novel drugs against AE.

45 **Author summary**

46 To ensure proper communication between their different cell populations, animals rely on  
47 secreted hormones and cytokines that act on receptors of target cells. Most of the respective  
48 cytokines, such as FGFs, evolved over 500 million years ago and are present in similar form  
49 in all animals, including parasitic worms. The authors of this study show that the metacestode  
50 larva of the tapeworm *E. multilocularis*, which grows like a malignant tumor within the host  
51 liver, expresses molecules with homology to FGF receptors from mammals. The authors show  
52 that human FGF, which is abundantly present in the liver, stimulates metacestode  
53 development and that all parasite FGF receptors are activated by human FGF, despite 500  
54 million years of evolutionary distance between both systems. This indicates that cells of the  
55 *Echinococcus* metacestode can directly communicate with cells of the mammalian host using  
56 evolutionarily conserved signaling molecules. This mode of host-pathogen interaction is  
57 unique for helminths and does not occur between mammals and single-celled pathogens such  
58 as protozoans or bacteria. The authors finally demonstrate that BIBF 1120, a drug used to  
59 treat human cancer, targets the *Echinococcus* FGF receptors and leads to parasite death. This  
60 opens new ways for the development of anti-parasitic drugs.

61

62

63

64

65

66

## 67 **Introduction**

68 The flatworm parasite *E. multilocularis* (fox-tapeworm) is the causative agent of alveolar  
69 echinococcosis (AE), one of the most dangerous zoonoses of the Northern hemisphere.  
70 Infections of intermediate hosts (rodents, humans) are initiated by oral uptake of infectious  
71 eggs which contain the parasite's oncosphere larval stage [1,2]. After hatching in the host  
72 intestine and penetration of the intestinal wall the oncosphere gains access to the liver, where  
73 it undergoes a metamorphic transition towards the metacestode larval stage [3]. The *E.*  
74 *multilocularis* metacestode consists of numerous vesicles which grow infiltratively, like a  
75 malignant tumor, into the liver tissue [1-3]. Due to the unrestricted growth of the metacestode,  
76 blood vessels and bile ducts of the liver tissue of the intermediate host are obstructed,  
77 eventually leading to organ failure [1]. Another hallmark of AE is extensive liver fibrosis  
78 which can lead to a complete disappearance of the liver parenchyma, and which most  
79 probably involves the activation of hepatic stellate cells during chronic infection [4,5].  
80 Surgical removal of the parasite tissue, the only possible cure, is not feasible in the majority  
81 of patients leaving benzimidazole-based chemotherapy as the only treatment option.  
82 However, benzimidazoles act parasitostatic only and have to be given for prolonged periods  
83 of time (often life-long), underscoring the need for novel treatment options against AE [1].

84 We previously established that *E. multilocularis* development and larval growth is exclusively  
85 driven by a population of somatic stem cells, the germinative cells, which are the only  
86 mitotically active cells of the parasite and which give rise to all differentiated cells [6]. Using  
87 *in vitro* cultivation systems for metacestode vesicles and germinative cells [7-10], we also  
88 demonstrated that host insulin fosters parasite development by acting on evolutionarily  
89 conserved receptor kinases of the insulin receptor family that are expressed by the  
90 metacestode [11]. Evidence has also been obtained that host epidermal growth factor (EGF)  
91 stimulates *Echinococcus* germinative cell proliferation, most probably by acting on parasite

92 receptor tyrosine kinases of the EGF receptor family [12,13]. These studies indicate that the  
93 interaction of host-derived hormones and cytokines with corresponding receptors of  
94 evolutionarily conserved signalling pathways that are expressed by the parasite may play an  
95 important role in AE host-parasite interaction. Although the *E. multilocularis* genome project  
96 already indicated that the parasite expresses receptor tyrosine kinases of the fibroblast growth  
97 factor (FGF) receptor family in addition to insulin- and EGF-receptors [14], no studies  
98 concerning the effects of host FGF and their possible interaction with parasite FGF receptors  
99 have been carried out to date.

100 FGFs are an ancient group of polypeptide cytokines that are present in diploblastic animals, in  
101 deuterostomes and, among protostomes, only in ecdysozoa (with some distantly related  
102 members in lophotrochozoa)[15,16]. Humans express 22 different FGFs of which several  
103 (FGF11 – FGF14) are not secreted and act independently of FGF receptors in an intracrine  
104 modus only [15]. The remaining FGFs act in a paracrine fashion and are typically released via  
105 N-terminal signal peptides. Notable exceptions are the prototypic FGF1 (acidic FGF) and  
106 FGF2 (basic FGF) which are ubiquitously expressed in human tissues, are the most active  
107 members of the FGF family, and are released in a signal peptide-independent manner [15].  
108 FGFs have a key role in metazoan embryonic development and, in adults, are typically  
109 involved in regeneration processes (angiogenesis, wound healing, liver regeneration,  
110 regeneration of nervous tissue)[15]. In the liver, particularly FGF1 but also FGF2 are present  
111 as proteins in significant amounts [17], are crucially involved in tissue regeneration upon  
112 damage [18,19], and are also upregulated and released during fibrosis [20]. Secreted FGFs  
113 act through surface receptor tyrosine kinases of the FGF receptor family, of which four  
114 isoforms, Fgfr1-Fgfr4, are expressed by humans [15]. The mammalian FGF receptors  
115 comprise an extracellular ligand-binding domain made up of three immunoglobulin (Ig)-like  
116 domains, a transmembrane domain, and a split intracellular kinase domain. FGF binding to

117 the cognate FGF receptors typically results in receptor dimerization, transphosphorylation and  
118 subsequent activation of downstream signalling pathways such as the Ras-Raf-MAPK  
119 (mitogen-activated protein kinase) cascade or the PI3K/Akt pathway [15].

120 FGF signalling pathways have, in part, already been studied in flatworms. In free-living  
121 planarian species *Dugesia japonica*, two members of the FGFR tyrosine kinases are expressed  
122 of which DjFGFR1 exhibits three immunoglobulin-like domains in the extracellular region  
123 whereas DjFGFR2 only contains two such domains [21]. Both receptors are expressed by X-  
124 ray sensitive planarian stem cells (neoblasts) and in cephalic ganglia and an important role of  
125 these FGFRs in planarian brain formation has been suggested [21,22]. Furthermore, similar  
126 FGF receptors were also detected in stem cells of the planarian *Schmidtea mediterranea* [23].  
127 In the genome of the flatworm parasite species *Schistosoma mansoni*, two FGFR-encoding  
128 genes were identified of which *fgfrA* codes for a predicted protein with two extracellular  
129 immunoglobulin domains and a split tyrosine kinase domain whereas the *fgfrB* gene product  
130 only comprises one immunoglobulin domain in the extracellular region [24]. Expression of  
131 *fgfrA* and *fgfrB* in neoblast-like somatic stem cells has been shown and evidence was  
132 obtained for an important role of both receptors in schistosome stem cell maintenance [25-  
133 27]. Hahnel et al. [24] also demonstrated that both receptors are enzymatically active, are  
134 expressed in the gonads of schistosomes, and are upregulated following pairing, indicating a  
135 role in parasite fertility. Interestingly, these authors also showed that treatment of adult  
136 schistosomes with FGFR inhibitors leads to a reduction of somatic neoblast-like stem cells in  
137 both genders [24].

138 In the present work we provide a detailed analysis of three FGFRs in the cestode *E.*  
139 *multilocularis* and show that the expression patterns of these receptors differ from those in  
140 planaria and schistosomes. We also demonstrate that all three *Echinococcus* FGFRs are  
141 activated in response to human FGFs and that host FGF stimulates parasite development *in*

142 *vitro*. Finally, we also show that inhibition of FGF signalling in *Echinococcus* larvae  
143 drastically reduces parasite development and survival.

144

145

## 146 **Methods**

### 147 **Organisms and culture methods**

148 FGF stimulation and inhibitor experiments were performed with the natural *E. multilocularis*  
149 isolate H95 [14]. Whole mount in situ hybridization was carried out using isolate GH09  
150 which, in contrast to H95, is still capable of producing brood capsules and protoscoleces *in*  
151 *vitro* [14]. All isolates were continuously passaged in mongolian jirds (*Meriones*  
152 *unguiculatus*) as previously described [9]. The generation of metacestode vesicles and axenic  
153 cultivation of mature vesicles was performed essentially as previously described [7,9] with  
154 media changes usually every three days. Primary cell cultures were isolated from mature  
155 vesicles of isolate H95 and propagated *in vitro* essentially as previously described [8-10] with  
156 media changes every three days unless indicated otherwise. For FGF stimulation assays, 10  
157 nM or 100 nM of recombinant human acidic FGF (FGF1) or basic FGF (FGF2)(both from  
158 ImmunoTools GmbH, Friesoythe, Germany) were freshly added to parasite cultures during  
159 medium changes. In the case of primary cells, cultivation was usually performed in cMEM  
160 medium which is host hepatocyte-conditioned DMEM (prepared as described in [10]). For  
161 inhibitor studies, specific concentrations of BIBF 1120 (Selleck Chemicals LLC, Houston,  
162 TX, USA) were added to parasite cultures as indicated and as negative control DMSO (0.1 %)   
163 was used. The formation of mature metacestode vesicles from primary cells and measurement  
164 of metacestode vesicles size was performed essentially as previously described [11].

165

166 **Nucleic acid isolation, cloning and sequencing**

167 RNA isolation from in vitro cultivated axenic metacestode vesicles (isolate H95),  
168 protoscoleces (isolate GH09), and primary cells (H95, GH09) was performed using a Trizol  
169 (5Prime, Hamburg, Germany)-based method as previously described [11]. For reverse  
170 transcription, 2 µg total RNA was used and cDNA synthesis was performed using  
171 oligonucleotide CD3-RT (5'-ATC TCT TGA AAG GAT CCT GCA GGT<sub>26</sub> V-3'). PCR  
172 products were cloned using the PCR cloning Kit (QIAGEN, Hilden, Germany) or the TOPO  
173 XL cloning Kit (invitrogen), and sequenced employing an ABI prism 377 DNA sequencer  
174 (Perkin-Elmer).

175 The full-length *emfr1* cDNA was cloned using as starting material the partial sequence of a  
176 cDNA of the closely related cestode *E. granulosus*, which encoded a FGFR-like tyrosine  
177 kinase domain but which lacked the coding regions for transmembrane and extracellular parts  
178 [28]. Using primers directed against the *E. granulosus* sequence (5'-CTA CGC GTG CGT  
179 TTT CTG ATG-3' for first PCR; 5'-CCC TCT GAT CCA ACC TAC GAG-3' for nested  
180 PCR), the 3' end of the corresponding *E. multilocularis* cDNA was subsequently PCR  
181 amplified from a metacestode (isolate H95) cDNA preparation using primers CD3 and  
182 CD3nest as previously described [29]. 5'-RACE was performed using the SMART RACE  
183 cDNA amplification kit (Clontech) according to the manufacturer's instructions using primers  
184 5'-ACC GTA TTT GGG TTG TGG TCG-3' (first PCR) and 5'-GAA CAG GCA GAT CGG  
185 CAG-3' (touchdown PCR) as previously described [30]. The presence of an in frame TAA  
186 stop codon 110 bp upstream of the *emfr1* ATG start codon indicated that the correct 5' end  
187 had been identified. In a final step, the entire *emfr1* cDNA was PCR amplified from  
188 metacestode cDNA using primers 5'-GAC ACA TCT CCT TGG CCG-3' and 5'-GCG AGT  
189 TGA TAC TTT ATG AGA G-3' and cloned using the TOPO XL PCR cloning kit



190 (Invitrogen). The sequence is available in the GenBank™, EMBL, and DDJB databases under  
191 the accession number LT599044.

192 For *emfr2* cloning we first identified by BLAST analyses on the published *E. multilocularis*  
193 genome sequence [14] a reading frame encoding a FGFR-like TKD annotated as  
194 EmuJ\_000196200. Transcriptome analyses [14] and 5'\_RACE experiments, however,  
195 indicated that there is actually read-through transcription between gene models  
196 EmuJ\_000196300 and EmuJ\_000196200. We thus designed primers 5'-ATG TGT CTC CGA  
197 GCT CTC TG-3', binding to the 5' end regions of gene model EmuJ\_000196300, and primer  
198 5'-TTA CTC GCT CGA TCG TGG GG-3', binding to the reading frame 3' end of gene  
199 model EmuJ\_000196200, to PCR amplify the entire reading frame from metacestode cDNA.  
200 The resulting PCR fragment was subsequently cloned using the TOPO XL cloning kit  
201 (Invitrogen) and fully sequenced. The sequence is available in the GenBank™, EMBL, and  
202 DDJB databases under the accession number LT599045.

203 For *emfr3* cloning and sequencing we used primers directed against the CDS 5' end (5'-ATG  
204 GCA CCT AAG GTT GTG TCA GGA-3') and 3' end (5'-GCA GAT GAG TAA GAA ACC  
205 CTC-3') of gene model EmuJ\_000893600 [14] for direct PCR amplification of the reading  
206 frame from metacestode cDNA. The resulting PCR fragment was subsequently cloned using  
207 the TOPO XL cloning kit (Invitrogen) and sequenced. The sequence is available in the  
208 GenBank™, EMBL, and DDJB databases under the accession number LT599046.

209

## 210 **BrdU proliferation assays**

211 Proliferation of *E. multilocularis* metacestode vesicles and primary cells was assessed by a  
212 bromodesoxyuridine (BrdU)-based method. Axenically cultivated metacestode vesicles (2-4  
213 mm in diameter) were manually picked and incubated in 12-well plates (Greiner BioOne,

214 Kremsmünster, Germany; 8 vesicles per well) in DMEM medium without serum for 2 days.  
215 Freshly isolated primary cells were plated on 12-well plates and grown for 2 days under  
216 axenic conditions in conditioned DMEM (cMEM) medium with serum [8]. BrdU  
217 (SigmaAldrich, taufkirchen, Germany) as well as recombinant human FGF1 and FGF2 were  
218 added at 1mM (BrdU) and 100 nM or 10 nM (FGF1, FGF2) final concentrations as indicated.  
219 Cultures were incubated for 48 h at 37°C under 5% CO<sub>2</sub> for metacestode vesicles or under  
220 nitrogen atmosphere [7,8] in the case of primary cells. Samples were analysed in duplicates in  
221 three independent experiments. As controls, metacestode vesicles or primary cells were  
222 incubated in either DMEM without serum or conditioned DMEM, without addition of FGFs.

223 Primary cells and metacestode vesicles were then isolated for genomic DNA analysis. In  
224 detail, vesicles and primary cells were first washed with 1xPBS, pelleted, and subsequently  
225 transferred to lysis buffer (100 mM NaCl, 10 mM Tris-HCl, pH 8.0; 50 mM EDTA, pH 8.0,  
226 0,5% SDS) supplemented with 20 µg/ml RNase A and 0,1 mg/ml proteinase K. Samples  
227 were then incubated at 50°C for 4 h under constant shaking for complete lysis. DNA was  
228 isolated by two rounds of phenol/chlorophorm extraction (1 vol of  
229 phenol/chlorophorm/isoamylalcohol 25:24:1). DNA was then precipitated with 2 vol of 96%  
230 ethanol and 0,1 vol of LiCl (pH 4,5) after overnight incubation at -20°C and centrifugation at  
231 20.000 ref for 30 min at 4°C and washed with 70% ethanol. The pellet was then air dried for  
232 15 min an resuspended in 1 x TE buffer (10 mM Tris, 1 mM EDTA, pH 8,0).

233 The DNA was then prepared for coating onto a 96-well plate (96 well optical bottom plates,  
234 Nunc, Langensfeld, Germany). To this end, 5 µg of DNA were combined with 1 vol of  
235 Reacti-Bind DNA Coating solution (Pierce Biotechnology, Rockford, IL, USA) and mixed for  
236 10 min. The DNA mix was then added to the microplates in duplicates and incubated  
237 overnight at room temperature with gentle agitation. The TE/Reacti-Bind DNA coating  
238 solution mix served as a negative control. Unbound DNA was removed by washing three

239 times with 1xPBS. After blocking with 5% nonfat dry milk in 1xPBS for 1 h at room  
240 temperature and extensive washing with 1xPBS, 100 µl of anti-BrdU-POD (Cell Proliferation  
241 ELISA, BrdU; Roche Applied Science, Mannheim, Germany) was added and incubated for  
242 90 min at room temperature. After incubation, microplates were washed three times with  
243 1xPBS buffer before substrate solution (Cell Proliferation ELISA, BrdU; Roche Applied  
244 Science, Mannheim, Germany) was added and the wells were incubated for 60 min. Stop-  
245 solution (25 µl of 1 M H<sub>2</sub>SO<sub>4</sub>) was added and absorbance of the samples was measured using  
246 an ELISA reader at 450 nm.

247

#### 248 **In situ hybridization protocols**

249 Coding sequences of FGF receptors from *E. multilocularis* were amplified by RT-PCR and  
250 cloned into the vectors pDrive (Qiagen) or pJET1.2 (Thermo Fisher). In the case of *emfr2*, the  
251 full length coding sequence was amplified using primers 5'-ATG TGT CTC CGA GCT CTC  
252 TG-3'(forward) and 5'-TTA CTC GCT CGA TCG TGG GG-3' (reverse), whereas partial  
253 coding sequences were amplified for *emfr1* (using forward primer 5'-GCA GTG GGC GTC  
254 TTC TTT CAC-3' and reverse primer 5'-GTA AAT GTG GGC CGA CAC TCA G-3') and  
255 for *emfr3* (using forward primer 5'-TTG CCC AGT CAT CCG CTA CAA G-3' and reverse  
256 primer 5'-GCA AGC GGT CAT GAG GCT GTA G-3'). The recombinant plasmids were  
257 used for *in vitro* transcription of digoxigenin-labelled RNA probes as previously described  
258 [6]. These probes were used for fluorescent WMISH of *in vitro* cultured *E. multilocularis*  
259 larvae as described in [6]. Control WMISH experiments using the corresponding sense probes  
260 were always negative (see Figure 2 and data not shown).

261

262

263 ***Xenopus* oocyte expression assays**

264 For expression in the *Xenopus* system, the *emfr1*, *emfr2*, and *emfr3* coding sequences without  
265 predicted signal peptide information were cloned into the pSecTag2/Hygro expression system  
266 (ThermoFisher Scientific, Germany) leading to an in frame fusion of the Igk leader sequence  
267 (provided by the vector system) and the *E. multilocularis* FGF receptor sequences under  
268 control of the T7 promoter. Capped messenger RNAs (cRNA) encoding EmFR1, EmFR2 and  
269 EmFR3 were then synthesized *in vitro* using the T7 mMessage mMachine Kit (Ambion,  
270 USA). Microinjection of EmFGFR cRNAs (60 ng in 60  $\mu$ l) was performed in stage VI  
271 *Xenopus laevis* oocytes according to the procedure previously described [31]. Following 48h  
272 of receptor expression, human FGF1 or FGF2 (R & D systems, UK) were added to the  
273 extracellular medium at the final concentration of 10 nM. cRNA of *Pleurodeles* FGFR1  
274 identified as homologous to human receptor [32] was a gift of Shi D.L. (CNRS UMR 722,  
275 Paris VI) and was used as a positive control.

276 In some experiments, BIBF1120 (stock solution 10mM in DMSO, Selleck Chemicals LLC)  
277 was added (0.1 to 20  $\mu$ M final concentration) 1 h before the addition of 10 nM FGF1 or FGF2  
278 on EmFR1, EmFR2, EmFR3 and *Pleurodeles* FGFR1 expressing oocytes. Following 15 h of  
279 FGF1 or FGF2 stimulation, oocytes were analyzed for their state of progression in the cell  
280 cycle. The detection of a white spot at the animal pole of the oocyte attested to G2/M  
281 transition and GVBD. Non-injected oocytes treated with progesterone (10  $\mu$ M) were used as  
282 positive controls of GVBD. For each assay, sets of 20-30 oocytes removed from 3 different  
283 animals were used.

284 Dead kinase (TK-) receptors were obtained by site-directed mutagenesis of the EmFR1,  
285 EmFR2 and EmFR3 constructs. The active DFG sites present in EmFR1 (D<sub>442</sub>FG), EmFR2

286 (D<sub>647</sub>FG) and EmFR3 (D<sub>701</sub>FG) were replaced by an inactivating motif (DNA) as described in  
287 [31].

288 For western blot analysis, oocytes were lysed in buffer A (50 mM Hepes pH 7.4, 500 mM  
289 NaCl, 0.05% SDS, 5 mM MgCl<sub>2</sub>, 1 mg ml<sup>-1</sup> bovine serum albumin, 10 µg ml<sup>-1</sup> leupeptin,  
290 10 µg ml<sup>-1</sup> aprotinin, 10 µg ml<sup>-1</sup> soybean trypsin inhibitor, 10 µg ml<sup>-1</sup> benzamidine, 1 mM  
291 PMSF, 1 mM sodium vanadate) and centrifuged at 4 °C for 15 min at 10,000 g. Membrane  
292 pellets were resuspended and incubated for 15 min at 4 °C in buffer A supplemented with 1%  
293 Triton X-100 and then centrifuged under the same conditions. Supernatants were analyzed by  
294 SDS-PAGE. Proteins were transferred to a Hybond ECL membrane (Amersham Biosciences,  
295 France). Membranes were incubated with anti-myc (1/50 000, Invitrogen France) or anti-PTyr  
296 (1/8000, BD Biosciences, France) antibodies and secondary anti-mouse antibodies (1/50 000,  
297 Biorad, France). Signals were detected by the ECL advance Western blotting detection kit  
298 (Amersham Biosciences, France)

299

### 300 **MAPK cascade activation assays**

301 Axenically cultivated metacystode vesicles of about 0.5 cm in diameter were incubated in  
302 DMEM medium with or without 10% FCS for 4 days. Vesicles cultivated without FCS were  
303 subsequently incubated with 10 nM FGF1 (aFGF) or 10 nM FGF2 (bFGF) for 30 sec, 60 sec  
304 or 60 min. Immediately after stimulation, vesicles were harvested, cut by a scalpel to remove  
305 cyst fluid and then subjected to protein isolation as described previously [33]. Isolated protein  
306 lysates were then separated on a 12% acrylamide gel and analysed by Western blotting using  
307 a polyclonal anti-Erk1/Erk2 antibody (ThermoFisher Scientific; #61-7400), recognizing Erk-  
308 like MAP kinases in phosphorylated and non-phosphorylated form, as well as a polyclonal  
309 antibody against phospho-Erk1/Erk2 (ThermoFisher Scientific; #44-680G), specifically

310 directed against the double-phosphorylated (activated) form of Erk1/Erk2 (Thr-185, Tyr-187).  
311 We had previously shown that these antibodies also recognize the Erk-like MAP kinase  
312 EmMPK1 of *E. multilocularis* in phosphorylated and non-phosphorylated form [33]. As  
313 secondary antibody, a peroxidase-conjugated anti-mouse IgG antibody (Dianova, Hamburg,  
314 Germany) was used. In inhibitor experiments, axenically cultivated metacystode vesicles were  
315 incubated with either 5  $\mu$ M or 10  $\mu$ M BIBF 1120 for 30 min and then processed essentially as  
316 described above.

317

### 318 **Computer analyses and statistics**

319 Amino acid comparisons were performed using BLAST on the nr-aa and swissprot database  
320 collections available under (<https://www.genome.jp/>). Genomic analyses and BLAST  
321 searches against the *E. multilocularis* genome [14] were done using resources at  
322 (<https://parasite.wormbase.org/index.html>). CLUSTAL W alignments were generated using  
323 MegAlign software (DNASTAR Version 12.0.0) applying the BLOSUM62 matrix. Domain  
324 predictions were carried out using the simple modular architecture research tool (SMART)  
325 available under (<http://smart.embl-heidelberg.de/>) as well as PROSITE scans available under  
326 (<https://prosite.expasy.org/scanprosite/>). Two-tailed, unpaired student's T-tests were  
327 performed for statistical analyses (GraphPad Prism, version 4). Error bars represent standard  
328 error of the mean. Differences were considered significant for p-values below 0.05 (indicated  
329 by \*).

330

### 331 **Ethical approval**

332 All experiments were carried out in accordance with European and German regulations on the  
333 protection of animals (*Tierschutzgesetz*). Ethical approval of the study was obtained from the

334 local ethics committee of the government of Lower Franconia (permit no. 55.2 DMS 2532-2-  
335 354).

336

## 337 **Results**

338 **The *E. multilocularis* genome encodes FGF receptor kinases but no canonical FGF**  
339 **ligands.**

340 By cDNA library screening and mining of the available *E. multilocularis* genome sequence  
341 we identified a total of three *Echinococcus* genes encoding members of the FGFR family of  
342 receptor tyrosine kinases. A partial cDNA for a gene encoding a tyrosine kinase with  
343 homology to FGFRs was previously cloned for *E. granulosus* [28] and by RT-PCR  
344 amplification of metacestode cDNA as well as 5'-RACE, the entire cDNA of the *E.*  
345 *multilocularis* ortholog, designated *emfr1* (*E. multilocularis* fibroblast growth factor receptor  
346 1), was subsequently cloned by us in this work. As shown in Fig 1, the encoded protein,  
347 EmFR1, contained an N-terminal export directing signal peptide, followed by one single Ig-  
348 like domain, a transmembrane region, and an intracellular tyrosine kinase domain (Figs 1 and  
349 S1). In the recently released *E. multilocularis* genome information [14], this gene was  
350 correctly predicted on the basis of genome and transcriptome data (*E. multilocularis* gene  
351 designation: EmuJ\_000833200). In the upstream genomic regions of *emfr1*, no information  
352 encoding potential Ig-like domains was identified which, together with the presence of a  
353 signal peptide sequence upstream of the single Ig-like domain, indicated that EmFR1 indeed  
354 contained only one single Ig-like domain. Amino acid sequence alignments indicated that the  
355 kinase domain of EmFR1 contains all residues critical for enzymatic activity at the  
356 corresponding positions (Fig S2) and SWISS-PROT database searches revealed highest

357 similarity between the EmFR1 kinase domain and that of human FGFR4 (42% identical aa;  
358 59% similar aa).

359

360 **Fig 1. Domain structure of *E. multilocularis* FGF receptors.** Schematic representation of  
361 the domain structure of the *E. multilocularis* receptors EmFR1, EmFR2, and EmFR3  
362 according to SMART (Simple Modular Architecture Tool) analyses. As a comparison, the  
363 structure of the human FGFR1 (HsFGFR1) is shown. Displayed are the location and size of  
364 the following predicted domains: tyrosine kinase domain (TKD) in purple and IG-domain (Ig)  
365 in orange. Predicted signal peptides are depicted in red and transmembrane domains are  
366 shown as blue bars. The numbers of amino acids in full length receptors are shown to the  
367 right.

368

369 A second gene encoding a tyrosine kinase with significant homology to known FGFRs was  
370 identified on the available *E. multilocularis* genome sequence [14] under the annotation  
371 EmuJ\_000196200. The amino acid sequence of the predicted protein only contained an  
372 intracellular tyrosine kinase domain, a transmembrane region, and one extracellular Ig-like  
373 domain, but no putative signal peptide. We therefore carried out 5'-RACE analyses on a  
374 cDNA preparation deriving from protoscolex RNA and identified the remaining 5' portion of  
375 the cDNA, which contained one additional Ig-like domain and a predicted signal peptide. In  
376 the genome annotation, these remaining parts were wrongly annotated as a separate gene  
377 under the designation EmuJ\_000196300. Hence, the second FGFR encoding gene of *E.*  
378 *multilocularis*, *emfr2*, encoding the protein EmFR2, actually comprises the gene models  
379 EmuJ\_000196300 and EmuJ\_000196200 of the genome sequence. EmFR2 thus comprises a  
380 signal peptide, two extracellular Ig-like domains, a transmembrane region, and an intracellular



381 TKD (Figs 1 and S1). The TKD contained all residues critical for tyrosine kinase activity (Fig  
382 S2) and, in SWISS-PROT BLASTP analyses, showed highest similarity to two FGF receptor  
383 kinases of the flatworm *Dugesia japonica* (45% identical, 65% similar residues), to the *S.*  
384 *mansoni* receptor FGFRB (55%, 68%) and to human FGFR3 (48%, 62%).

385 The third FGF receptor encoding gene of *E. multilocularis*, *emfr3*, was identified under the  
386 designation EmuJ\_000893600 and was originally listed as an ortholog of the tyrosine protein  
387 kinase Fes:Fps [14]. However, unlike the Fes:Fps kinase which contains FCH and SH2  
388 domains, the EmuJ\_000893600 gene product, EmFR3, comprised an N-terminal signal  
389 peptide, two extracellular Ig-like domains, a transmembrane region, and an intracellular TKD  
390 (Figs 1 and S1), in which 22 of 30 highly conserved residues of tyrosine kinases are present at  
391 the corresponding position (Fig S2). Furthermore in SWISS-PROT BLASTP analyses the  
392 EmFR3 TKD displayed highest similarity to several vertebrate FGF receptors and to human  
393 FGFR2 (32%, 47%). We thus concluded that EmuJ\_000893600 actually encoded a third  
394 *Echinococcus* FGF receptor tyrosine kinase.

395 Apart from *emfr1*, *emfr2*, and *emfr3*, no further genes were identified in the *E. multilocularis*  
396 genome which displayed clear homology to known FGFR TKDs and which contained  
397 characteristic IG domains in the extracellular portions. In vertebrates, structural homology has  
398 been described between the TKDs of the receptor families of FGF receptors, the vascular  
399 endothelial growth factor (VEGF) receptors, and the platelet-derived growth factor (PDGF)  
400 receptors, which also contain varying number of Ig domains in the extracellular parts [36].  
401 Furthermore, VEGF receptor-like molecules have also been described in invertebrates such as  
402 *Hydra* [36]. We therefore carried out additional BLASTP searches on the *E. multilocularis*  
403 genome using human VEGF- and PDGF-receptors as queries, but only obtained significant  
404 hits with the above mentioned TKDs of EmFR1, EmFR2, and EmFR3 (data not shown).

405 These data indicated that members of the VEGF- and PDGF-receptor families are absent in  
406 *Echinococcus*, as has already been described for the closely related schistosomes [24].

407 Genes encoding canonical FGF ligands have so far neither been identified in genome projects  
408 of free-living flatworms [37], nor in those of trematodes [38] or cestodes [14]. In vertebrates  
409 [15] as well as several invertebrate phyla [39-41], however, canonical FGF ligands are clearly  
410 expressed. To investigate the situation more closely, we carried out BLASTP and BLASTX  
411 analyses against the predicted proteins and *E. multilocularis* contig information, respectively,  
412 using FGF ligand sequences of insect, nematode, and cnidarian origin as queries. The product  
413 of only one *E. multilocularis* gene, EmuJ\_000840500 (annotated as ‘conserved hypothetical  
414 protein’) showed certain similarity to these FGF ligands and according SMART protein  
415 domain analyses could contain a FGF-ligand domain between amino acids 166 and 258,  
416 although this prediction was clearly below the prediction threshold and of low probability (E-  
417 value: 817). No export directing signal peptide was predicted for the EmuJ\_000840500  
418 protein, as would be typical for FGF ligands. Furthermore, although EmuJ\_000840500 had  
419 clear orthologs in the cestodes *Taenia solium* (TsM\_000953800) and *Hymenolepis*  
420 *microstoma* (HmN\_000558500), none of these gene models had any prediction of an FGF-  
421 ligand domain in SMART analyses (nor predicted signal peptides). We thus considered it  
422 highly unlikely that EmuJ\_000840500 encodes a so far not identified flatworm FGF-ligand.

423 Taken together, our analyses indicated that *E. multilocularis* contains genomic information  
424 for three members of the FGFR family of receptor tyrosine kinases with either one (EmFR1)  
425 or two (EmFR2, EmFR3) extracellular Ig-like domains, of which one, EmFR3, showed higher  
426 divergence within the TKD as it contained only 22 of otherwise 30 highly conserved amino  
427 acid residues of tyrosine kinases. On the other hand, no members of the VEGF- and PDGF-  
428 receptor families are encoded by the *E. multilocularis* genome, nor does it contain genes  
429 coding for canonical FGF-ligands.

430

431 **Expression of FGF receptors in *E. multilocularis* larval stages.**

432 To investigate gene expression patterns of the *Echinococcus* FGF receptors in parasite larvae,  
433 we first inspected Illumina transcriptome data for parasite primary cells after 2 and 11 days of  
434 culture (PC2d, PC11d, respectively), metacestode vesicles without or with brood capsules  
435 (MC-, MC+, respectively), as well as protoscoleces before or after activation by low  
436 pH/pepsin treatment (PS-, PS+, respectively), that had been produced during the *E.*  
437 *multilocularis* genome project [14]. According to these data, *emfr1* was moderately expressed  
438 in primary cells, metacestode vesicles, and protoscoleces (Fig S3). Likewise, *emfr2* was  
439 expressed in all stages, but very lowly in primary cells, somewhat more in metacestode  
440 vesicles, and highest in protoscoleces. *emfr3*, on the other hand, was low to moderately  
441 expressed in primary cells, low in metacestode vesicles, and highest in protoscoleces (Fig S3).  
442 Since primary cell preparations are characterized by a much higher content of germinative  
443 (stem) cells than metacestode vesicles [6], these expression patterns could indicate that *emfr3*  
444 is stem cell specifically expressed. We therefore carried out semi-quantitative RT-PCR  
445 experiments on cDNA preparations from *in vitro*-cultivated metacestode vesicles (MV) versus  
446 metacestode vesicles after treatment with hydroxyurea (MV-HU) or the Polo-like kinase  
447 inhibitor BI 2536 (MV-BI), in which the stem cell population had been selectively depleted  
448 [6,42]. While *emfr1* was well expressed in MV as well as MV-HU and MV-BI, both *emfr2*  
449 and *emfr3* transcripts were barely detectable in MV-HU and MV-BI (data not shown). This  
450 indicated that *emfr1* does not have a typical stem cell specific expression pattern whereas  
451 *emfr2* and *emfr3* could be expressed in the parasite's stem cells or their immediate progeny  
452 (since HU- and BI 2536-treatment has to be carried out for at least one week [6,42]).

453 To clarify the situation we carried out whole-mount *in situ* hybridization experiments on  
454 metacystode vesicles according to recently established protocols [6,43,44]. In these  
455 experiments, proliferating parasite stem cells were labeled by incorporation of the nucleotide  
456 analog EdU, which was combined with detection of gene transcripts by using fluorescently  
457 labeled probes. According to these experiments, *emfr1* was expressed at low levels throughout  
458 the germinal layer and especially during the development of protoscolexes (Fig 2). The  
459 intensity of the signal was heterogenous, but no clear pattern could be discerned and it was  
460 too low to clearly determine the percentage of positive cells.

461

462 **Fig 2. WMISH analysis of *emfr1* expression.** Left panel, antisense probe detecting *emfr1*  
463 expression. Right panel, sense probe (negative control). WMSIH signal is shown in green,  
464 nuclear DAPI staining in blue. *gl*, germinal layer; *ps*, developing protoscolex. Bar: 20  $\mu$ m

465

466 *emfr2*, on the other hand, was specifically expressed in a population of small sized cells,  
467 which comprised 1.7% to 6.3% of all cells in the germinal layer (Fig 3A). None of these  
468 *emfr2*<sup>+</sup> cells were also EdU<sup>+</sup>, indicating that they were post-mitotic [6]. During initial  
469 protoscolex development, *emfr2*<sup>+</sup> cells accumulated in the peripheral-most layer of cells, as  
470 well as in the anterior-most region (which will form the rostellum), and in three longitudinal  
471 bands of cells in the interior of the protoscolex buds (Fig 3B). Again, practically none of the  
472 *emfr2* labelled cells was EdU<sup>+</sup> (less than 1% of *emfr2*<sup>+</sup> cells were EdU<sup>+</sup>; Fig 3C). Later during  
473 development, some *emfr2*<sup>+</sup> cells were found in the protoscolex body, but most accumulated in  
474 the developing rostellum and the suckers (Fig 3D). Importantly, *emfr2* expression was  
475 restricted to the sucker cup, where cells are differentiating into *em-tpm-hmw*<sup>+</sup> muscle cells [6],  
476 and not the sucker base, where EdU<sup>+</sup> germinative cells accumulate [6] (Fig 3D). Taken

477 together, these data indicate that *emfr2* is expressed in post-mitotic cells, of which many are  
478 likely to be differentiating or differentiated muscle cells.

479

480 **Fig 3. WMISH analysis of *emfr2* expression.** Shown are WMISH analyses of *emfr2*  
481 expression (A, B) and co-detection of *emfr2* WMISH and EdU incorporation (C, D, E) during  
482 metacestode development. In C, D, and E, metacestodes were cultured in vitro with 50  $\mu$ M  
483 EdU for 5 h and were then processed for WMISH and EdU detection. In all panels the  
484 WMISH signal is shown in green, EdU detection in red, and DAPI nuclear staining in blue. A,  
485 detail of the germinal layer. B, general view of a region of a metacestode with protoscolexes  
486 in different stages of development. C, early protoscolex development. D, late protoscolex  
487 development. E, Detail of a sucker, maximum intensity projection of a confocal Z-stack. *r*,  
488 rostellum; *s*, sucker. Bars are 20  $\mu$ m for A, 50  $\mu$ m for B, 10  $\mu$ m for C, and 50  $\mu$ m for D. Sense  
489 probe (negative control) was negative in all samples.

490

491 Finally, *emfr3* was expressed in very few cells in the germinal layer (less than 1% of all cells,  
492 although the number is difficult to estimate since they were absent in most random  
493 microscopy fields) (Fig 4A). *emfr3*<sup>+</sup> cells accumulated in small numbers during brood capsule  
494 and protoscolex development (Fig 4B). The *emfr3*<sup>+</sup> cells had a large nucleus and nucleolus  
495 and, thus, had the typical morphology of germinative cells (Fig S4). At the final stages of  
496 protoscolex development, few *emfr3*<sup>+</sup> cells were present in the body region and some signals  
497 were also present in the rostellar region (Fig S4). In the developing protoscolex and in the  
498 germinal layer, *emfr3*<sup>+</sup> EdU<sup>+</sup> double positive cells were found (Fig 4). These data indicated  
499 that *emfr3* is expressed in a very small number of proliferating cells with the typical  
500 morphology of germinative cells.

501

502 **Fig 4. Co-detection of *emfr3* WMISH and EdU incorporation during metacestode**  
503 **development.** Metacestodes were cultured in vitro with 50  $\mu$ M EdU for 5 h and were then  
504 processed for WMISH and EdU detection. In panels displaying multiple channels, the  
505 WMISH signal is shown in green, EdU detection in red, and nuclear DAPI staining in blue. A,  
506 germinal layer. B, developing protoscolex. Arrowheads indicate Edu<sup>+</sup> *emfr3*<sup>+</sup> double-positive  
507 cells. Bars are 25  $\mu$ m for A, 50  $\mu$ m for B (main panel) and 10  $\mu$ m for B (enlarged inset).

508

509 In summary, the three *E. multilocularis* FGF receptor genes showed very different expression  
510 patterns in metacestode and protoscolex larval stages. While *emfr1* was lowly expressed in  
511 cells that are dispersed throughout the germinal layer, *emfr2* displayed an expression pattern  
512 indicative of differentiating/differentiated muscle cells. *emfr3*, on the other hand, appeared to  
513 be expressed in a minor sub-population of germinative cells.

514

#### 515 **Host FGF stimulates *E. multilocularis* larval proliferation and development**

516 Since *E. multilocularis* larvae do not express canonical FGF ligands (see above), but usually  
517 develop in an environment in which FGF1 and FGF2 are abundant [17], we next tested  
518 whether host-derived FGF ligands can stimulate parasite development *in vitro*. To this end,  
519 we employed two different cultivation systems which we had previously established [7-10].  
520 In the axenic metacestode vesicle cultivation system, mature metacestode vesicles of the  
521 parasite are cultivated in the absence of host cells under reducing culture conditions (e.g. low  
522 oxygen)[7,9]. In the primary cell cultivation system [8,10], axenically cultivated metacestode  
523 vesicles are digested to set up cell cultures which are highly enriched in parasite germinative

524 (stem) cells (~ 80% [6]), but which also contain certain amounts of differentiated cells such as  
525 muscle or nerve cells. In the primary cell cultivation system, mature metacystode vesicles are  
526 typically formed within 2 – 3 weeks, which is critically dependent on proliferation and  
527 differentiation of the germinative cell population [6] in a manner highly reminiscent of the  
528 oncosphere-metacystode transition [3].

529 As shown in Fig 5A, the exogenous addition of 10 nM FGF1 to mature metacystode vesicles  
530 already resulted in an elevated incorporation of BrdU, indicating enhanced proliferation of  
531 parasite stem cells, which was even more pronounced in the presence of 100 nM FGF1. In the  
532 case of FGF2, addition of 100 nM resulted in enhanced BrdU incorporation in a statistically  
533 significant manner (Fig 5A). Likewise, metacystode vesicles cultured for 4 weeks in the  
534 presence of 10 nM FGF1 or FGF2 displayed a considerably larger volume (about two-fold)  
535 when compared to non-FGF-stimulated vesicles (Fig 5B).

536

537 **Fig 5. Effects of host FGFs on *E. multilocularis* proliferation and development.** **A**, effects  
538 of FGFs on metacystode proliferation. Axenically cultivated metacystode vesicles (eight per  
539 well) were incubated for 48 h in DMEM medium (without FCS), then BrdU (1 mM) and  
540 FGFs (10 or 100 nM) were added and incubation proceeded for another 48 h before cell lysis,  
541 DNA isolation, and BrdU detection. Bars represent percentage of BrdU incorporation with the  
542 cMEM control set to 100%. Statistical evaluation of four independent experiments (n=4)  
543 which were conducted in duplicates is shown. Student's t-test (two tailed): \*p<0.05. **B**,  
544 effects of host FGFs on metacystode vesicle development. Single axenically generated  
545 metacystode vesicles were *in vitro* cultivated for four weeks in the presence of 10 nM FGF1  
546 (aFGF) or 5 nM FGF2 (bFGF) with daily medium changes. Control vesicles were kept in  
547 cMEM. Growth (in ml) of vesicles was monitored. In each of three independent experiments

548 (n=3), four vesicles were examined for every single condition. C, effects of FGFs on *E.*  
549 *multilocularis* primary cell proliferation. Freshly isolated *E. multilocularis* primary cells were  
550 incubated for 48 h in 2 ml cMEM, then BrdU (1 mM) and FGFs (100 nM) were added and  
551 cells were incubated for another 48 h before DNA isolation and BrdU detection. Statistical  
552 analysis was performed as in A. D, effects of host FGFs on metacestode vesicle development.  
553 Freshly prepared *E. multilocularis* primary cells were cultured for 21 days in cMEM medium  
554 in the presence or absence of 100 nM FGF1 (aFGF) or FGF2 (bFGF). Half of the medium  
555 volume was renewed every second day. The number of newly formed metacestode vesicles at  
556 day 21 was analysed. The bars represent the percentage of formed vesicles with the cMEM  
557 control set to 100%. The statistical evaluation of three independent experiments (n=3) which  
558 were conducted in duplicates is shown. Student's t-test (two-tailed): \*p<0.05.

559

560 In the primary cell cultivation system, 100 nM concentrations of host ligands had to be added  
561 to observe statistically significant effects. Again, the incorporation of BrdU by primary cell  
562 cultures was stimulated in the presence of host-derived FGF ligands (Fig 5C), as was the  
563 formation of mature metacestode vesicles from primary cell cultures (Fig 5D).

564 Taken together, these results indicated that host-derived FGF ligands, and in particular FGF1,  
565 can stimulate cell proliferation and development of *E. multilocularis* primary cell cultures and  
566 mature metacestode vesicles.

567

568 **The *E. multilocularis* FGF receptors are activated by host-derived FGF ligands.**

569 Having shown that host-derived FGF ligands can stimulate parasite proliferation and  
570 development *in vitro*, we were interested whether these effects might be mediated by one or



571 all three of the parasite's FGF receptors which are expressed by the metacystode larval stage.  
572 To this end, we first made use of the *Xenopus* oocyte expression system in which the activity  
573 of heterologously expressed protein kinases can be measured by germinal vesicle breakdown  
574 (GVBD). This system has previously been used to measure the activities of the TKD of  
575 schistosome FGF receptors [24], as well as the host-EGF (epidermal growth factor) dependent  
576 activation of a schistosome member of the EGF receptor family [31]. We, thus, expressed  
577 *Pleurodeles* FGFR1 (as a positive control), which is highly similar to human FGFR1 [32], and  
578 all three parasite FGF receptors in *Xenopus* oocytes, which were then stimulated by the  
579 addition of 10 nM FGF1 or FGF2. As negative controls, we also expressed kinase-dead  
580 versions of all *Echinococcus* FGF receptors in *Xenopus* oocytes.

581 As can be deduced from Table 1, control (non-stimulated) oocytes were negative for GVBD,  
582 whereas progesterone-stimulated oocytes displayed 100% vesicle breakdown. Expression of  
583 FGFR1 did not yield GVBD but, after stimulation with 10 nM FGF1, 100% of oocytes  
584 underwent GVBD, indicating stimulation of the *Pleurodeles* receptor by FGF1 (as expected).  
585 Upon expression of any of the parasite receptors in *Xenopus* oocytes, no GVBD was observed  
586 when no ligand was added. The addition of 10 nM FGF1 to these receptors, however, resulted  
587 in 100% GVBD for EmFR1 and EmFR2, as well as to 80% GVBD in the case of EmFR3. In  
588 the case of human FGF2 (10 nM), 90% GVBD was observed for EmFR1 and EmFR3, and  
589 85% for EmFR2. No GVBD was observed upon addition of 10 nM FGF1 or FGF2 when the  
590 kinase-dead versions of the parasite receptors were expressed (data not shown and Fig S5).  
591 These data clearly indicated that all three parasite receptors were responsive to host derived  
592 FGF ligands (albeit to somewhat different extent) and that the kinase activity of the parasite  
593 receptors was essential to transmit the signal. We also measured the phosphorylation state of  
594 the parasite FGF receptors upon addition of exogenous FGF1 and FGF2 (10 nM each) to

595 *Xenopus* oocytes and obtained significantly induced levels of tyrosine phosphorylation in all  
596 three cases (Fig S5).

597 Taken together, these data indicated that all three parasite FGF receptors were activated by  
598 binding of host-derived FGF1 and FGF2, which was followed by auto-phosphorylation of the  
599 intracellular kinase domain and downstream transmission of the signal to the *Xenopus* oocyte  
600 signaling systems which induce GVBD.

601

602

603

604

605

606

607

608

609

610

611

612

613

614

615

616

617

618

619

620

621

622 **Table 1. Effects of host FGFs and BIBF 1120 on *E. multilocularis* FGF receptors.**

| BIBF1120      |     | 1 $\mu$ M | 10 $\mu$ M | 20 $\mu$ M |
|---------------|-----|-----------|------------|------------|
| control       | 0   | 0         | 0          | 0          |
| Progesterone  | 100 | 100       | 100        | 70         |
|               |     |           |            |            |
| FGFR1         | 0   | 0         | 0          | 0          |
| FGFR1 + hFGF1 | 100 | 40        | 0          | 0          |
| EmFR1         | 0   | 0         | 0          | 0          |
| EmFR1 + hFGF1 | 100 | 90        | 0          | 0          |
| EmFR1 + hFGF2 | 90  | 50        | 0          | 0          |
| EmFR2         | 0   | 0         | 0          | 0          |
| EmFR2 + hFGF1 | 100 | 50        | 0          | 0          |
| EmFR2 + hFGF2 | 85  | 0         | 0          | 0          |
| EmFR3         | 0   | 0         | 0          | 0          |
| EmFR3 + hFGF1 | 80  | 80        | 30         | 0          |
| EmFR3 + hFGF2 | 90  | 80        | 30         | 0          |

623

624

625 **Table 1.** *Pleurodeles* FGFR1 (FGFR1) and the three *E. multilocularis* FGF receptors  
626 (EmFR1, EmFR2, EmFR3, as indicated) were expressed in *Xenopus* oocytes without or with  
627 human FGF1 (hFGF1) or FGF2 (hFGF2) and in the presence of different concentrations of  
628 BIBF 1120 (as indicated). Germinal vesicle breakdown (GVBD) was monitored after 15 h of  
629 incubation. Numbers indicate % of GVBD, mean of two independent experiments.

630

631

632

633 **Inhibition of the *E. multilocularis* FGF receptors by BIBF 1120.**

634 The small molecule compound BIBF 1120 (also known as Nintedanib or Vargatef™) is a  
635 well-studied and highly selective, ATP-competitive inhibitor of mammalian members of the  
636 FGF-, VEGF-, and PDGF-receptor families with very limited affinity to other receptor  
637 tyrosine kinases [45,46]. As a possible agent to selectively inhibit FGF receptor tyrosine  
638 kinase activities in the parasite, we measured the effects of BIBF 1120 on EmFR1, EmFR2,  
639 and EmFR3 upon expression in the *Xenopus* oocyte system. As can be deduced from Table 1,  
640 a concentration of 1  $\mu$ M of exogenously added BIBF 1120 already diminished the activity  
641 (after stimulation with 10 nM FGF1) of FGFR1 to 40%, and led to a complete block of kinase  
642 activity upon addition of 10  $\mu$ M BIBF 1120. In the case of EmFR1 and EmFR2, 1  $\mu$ M  
643 BIBF1120 also led to a marked decrease of receptor kinase activity, although to a somewhat  
644 lower extent than in the case of FGFR1. In the presence of 10  $\mu$ M BIBF 1120, on the other  
645 hand, the activities of EmFR1 and EmFR2 were completely blocked. In the case of EmFR3,  
646 exogenous addition of 1  $\mu$ M BIBF 1120 had only slight effects on GVBD, whereas 10  $\mu$ M  
647 BIBF 1120 reduced the activity to less than 50% and 20  $\mu$ M BIBF 1120 completely blocked  
648 tyrosine kinase-dependent GVBD (Table 1). Upon addition of 20  $\mu$ M BIBF 1120, tyrosine  
649 kinase activity of all receptors tested was completely inhibited.

650 Taken together, these data indicated that all three *Echinococcus* FGF receptor tyrosine kinases  
651 were affected by BIBF 1120, although in all three cases higher concentrations of the inhibitor  
652 were necessary to completely block tyrosine kinase activity when compared to FGFR1. BIBF  
653 1120 treatment had the lowest effects on the activity of EmFR3.

654

655 **BIBF 1120 inhibits *E. multilocularis* larval development.**

656 We next tested the effects of different concentrations of BIBF 1120 on parasite development  
657 and survival in the primary cell and metacystode vesicle culture systems. As shown in Fig 6A,  
658 the addition of 1 – 10  $\mu$ M BIBF 1120 had clear concentration dependent effects on mature  
659 metacystode vesicle survival which, after cultivation for 18 days, led to about 20% surviving  
660 vesicles in the presence of 1  $\mu$ M BIBF 1120, 10% surviving vesicles in the presence of 5  $\mu$ M  
661 BIBF 1120, and no survival when 10  $\mu$ M BIBF 1120 was applied. To test whether the  
662 metacystode vesicles were indeed no longer capable of parasite tissue regeneration, we set up  
663 primary cell cultures from microscopically intact vesicles which had been treated with 5  $\mu$ M  
664 BIBF 1120 for 5 days (90% intact vesicles) and let the cultures recover in medium without  
665 inhibitor. From these cultures, however, we never obtained the formation of mature vesicles  
666 (data not shown), indicating that either the parasite's stem cell population, and/or other cell  
667 types necessary for parasite development in the primary cell culture system, were severely  
668 damaged after BIBF 1120 treatment.

669

670 **Fig 6. Effects of BIBF 1120 on *E. multilocularis* metacystode vesicles and primary cells.**

671 A, axenically cultivated metacystode vesicles (8 per well in 2 ml volume) were incubated for  
672 18 days in the presence of 0.1 % DMSO or BIBF 1120 in different concentrations (as  
673 indicated) and the structural integrity of the vesicles was monitored. Structurally intact  
674 vesicles (B) and damaged vesicles (C) are shown to the right. The experiment was repeated  
675 three times in duplicates. D, freshly isolated *E. multilocularis* primary cells were cultured for  
676 21 days in cMEM medium in the presence of DMSO (0.1 %) or BIBF 1120 at different  
677 concentrations (as indicated). After 21 days, newly formed metacystode vesicles were  
678 counted. The DMSO control for each of the three independent experiments was set to 100%.

679 Microscopic images (25x magnification) of cultures after 2 weeks with DMSO (E) or 10  $\mu$ M  
680 BIBF 1120 (F) are shown to the right.

681

682 We then also tested the effects of BIBF 1120 on fresh primary cell cultures from previously  
683 untreated metacystode vesicles. As shown in Fig 6B, a concentration of 1  $\mu$ M BIBF 1120 had  
684 no effect on the formation of metacystode vesicles from these cultures, whereas vesicle  
685 formation was completely blocked in the presence of 5  $\mu$ M or 10  $\mu$ M BIBF 1120.

686 Altogether, these results clearly indicated detrimental effects of BIBF 1120 on parasite  
687 development already at concentrations as low as 5  $\mu$ M. Since the parasite does not express  
688 known alternative targets for BIBF 1120, such as VEGF- or PDGFR-receptors, we deduced  
689 that these effects are due to the inhibition of one or more of the parasite's FGF receptor  
690 tyrosine kinases.

691

### 692 **Host FGF ligands stimulate Erk signaling in *E. multilocularis*.**

693 One of the major downstream targets of FGF signaling in other organisms is the Erk-like  
694 MAPK cascade, a complete module of which we had previously identified in *E.*  
695 *multilocularis* [33,47,48]. In particular, we had previously shown that the phosphorylation  
696 status of the parasite's Erk-like MAP kinase, EmMPK1, can be measured by using antibodies  
697 against the phosphorylated form of the human Erk-kinase [33]. To investigate whether  
698 exogenously added host FGF can affect the *E. multilocularis* Erk-like MAPK cascade  
699 module, we first incubated mature metacystode vesicles for 4 days in serum-free medium  
700 (which has no effect on vesicle integrity [29]) and then stimulated these vesicles for 30 sec,  
701 60 sec, and 60 min with 10 nM FGF1 and FGF2. As shown in Fig 7A, FGF1 treatment had a

702 clear effect of EmMPK1 phosphorylation already after 30 sec of exposure. In the case of  
703 FGF2, the effect was still measurable, but clearly less pronounced than in the case of FGF1  
704 (Fig. 7A). We then also measured the effects of BIBF 1120 treatment on EmMPK1  
705 phosphorylation. To this end, metacestode vesicles were incubated in hepatocyte-conditioned  
706 medium and were then subjected to BIBF 1120 treatment (5  $\mu$ M, 10  $\mu$ M) for 30 min. As  
707 shown in Fig 7B, this led to diminished phosphorylation of EmMPK1 when 10  $\mu$ M BIBF  
708 1120 was used.

709 Taken together, these data indicated that, like in mammals and other invertebrates, the *E.*  
710 *multilocularis* Erk-like MAPK cascade can be activated through FGF signaling, initiated by  
711 exogenously added, host-derived FGF ligands.

712

713 **Fig 7. Effects of host FGFs and BIBF 1120 on EmMPK1 phosphorylation in metacestode**  
714 **vesicles.** **A**, axenically cultivated metacestode vesicles were incubated in cMEM (control) or  
715 in medium without FCS (0 s), upon which FGF1 (aFGF) or FGF2 (bFGF) were added at a  
716 concentration of 10 nM for 30 sec (30s), 60 sec (60s) or 60 min (60min). Protein lysates were  
717 subsequently separated by 12% SDS-PAGE and Western blots were analysed using  
718 polyclonal antibodies against Erk-like MAP kinases (anti-ERK) or double phosphorylated  
719 Erk-like MAP kinases (anti-p-ERK). **B**, axenically cultivated metacestode vesicles were  
720 incubated with DMSO (negative control), 5 mM or 10 mM BIBF1120 (30 min each) and cell  
721 lysates were subsequently analysed as described above. Both experiments were performed in  
722 triplicate with similar results.

723

724

725 **Discussion**

726 An important difference between parasitic helminths and all other infectious agents  
727 (excluding viruses) is that these organisms are evolutionarily relatively closely related to their  
728 vertebrate or invertebrate hosts with which they share an ancestor that has lived around 500 to  
729 600 million years ago. Since all metazoans share evolutionarily conserved signalling systems  
730 for cell-cell communication, this opens the possibility for host-parasite cross-communication  
731 involving evolutionarily conserved cytokines of one partner (e.g. the host) and cognate  
732 receptors of the other (e.g. the parasite), which would be of particular relevance for systemic  
733 helminths that infect host organs. Several previous studies indicated that this type of host-  
734 pathogen interaction is indeed important in helminth infections. In the *E. multilocularis*  
735 system, which develops in close association with host liver tissue, we previously  
736 demonstrated that host insulin stimulates parasite development and growth via acting on  
737 evolutionarily conserved insulin-receptor tyrosine kinases that are expressed by the parasite  
738 [11]. A similar type of cytokine receptor interaction appears to involve epidermal growth  
739 factor (EGF)-like cytokines and cognate parasite receptors, of which three (EmER, EmERb,  
740 EmERc) are expressed by *E. multilocularis* larvae [3,12]. As recently shown by Cheng et al.  
741 [13], host-derived EGF is able to stimulate germinative cell proliferation in *in vitro* cultivated  
742 parasite larvae and can stimulate at least one of the parasite EGF-receptors, EmER, when  
743 heterologously expressed in *Xenopus* oocytes. Although the parasite itself expresses several  
744 EGF-like molecules [14], which likely act on its EGF receptors, these data indicate that host-  
745 EGF could act as an additional stimulus, particularly in response to liver tissue damage as it is  
746 inflicted upon entry of the parasite into the host liver [4]. Apart from insulin- and EGF-  
747 signalling systems, host-parasite interactions in larval cestode infections might also involve  
748 the family of transforming growth factor (TGF)- $\beta$ /bone morphogenetic protein (BMP)-family  
749 of cytokines since host TGF- $\beta$  has very recently been shown to stimulate larval growth of the



750 cestode *Taenia crassiceps in vitro* and was found to interact with parasite TGF- $\beta$  receptors  
751 [49]. In a similar way, human BMP2 was reported by us to interact with an *E. multilocularis*  
752 BMP receptor [50], although no direct effects of host BMP on parasite development were yet  
753 observed. Like in cestodes, the occurrence of insulin- and EGF-receptor tyrosine kinases as  
754 well as TGF- $\beta$ /BMP serine/threonine kinases with the capability of interacting with respective  
755 human hormones/cytokines was reported for schistosomes [31,51-55], and stimulatory effects  
756 of host EGF on the development of schistosome snail stages were observed [31]. In the  
757 present work, we extend the list of respective host-parasite cross-communication systems to  
758 the FGF-family of host cytokines and cognate FGF receptor tyrosine kinases which, to our  
759 knowledge, have never before been addressed in this context.

760 We herein clearly show that mammalian FGF1 and FGF2 stimulate the development of *E.*  
761 *multilocularis* metacestode vesicles from cultivated parasite primary cells, which are highly  
762 enriched in germinative (stem) cells [6]. Furthermore, we show that human FGF also  
763 stimulates proliferation and growth of mature metacestode vesicles. Both FGF1 and FGF2 are  
764 abundantly present in mammalian liver tissue where they are mostly released upon liver cell  
765 damage and during regeneration processes [17-20]. Although the precise amounts of host  
766 FGF in periparasitic lesions of *E. multilocularis* infected mice has not been measured to date,  
767 it is very likely that the early establishing metacestode is encountering considerable amounts  
768 of these cytokines since extensive damage to liver tissue is observed not only in chronically  
769 infected mice but also in early stages of the infection [4]. The early infectious stage is critical  
770 in the establishment of the parasite since the invading oncosphere is not yet producing the  
771 laminated layer (LL), an important structure that protects the parasite from direct actions of  
772 immune cells [56]. The laminated layer surrounds mature metacestode vesicles (established  
773 after 1-2 weeks after invasion) in the chronic phase of the disease. The stimulation of parasite  
774 development from stem cells towards mature metacestode vesicles by host FGF, as observed

775 in our cultures, could thus help the parasite to abridge this critical phase and to successfully  
776 establish within the liver. Chronic AE is characterized by extensive liver fibrosis, particularly  
777 in the peri-parasitic area [57] and is thought to be mediated by hepatic stellate cells [5], which  
778 greatly upregulate FGF release during liver regeneration and fibrosis induction [20]. Hence,  
779 not only in the initial phase of parasite establishment, but also in the chronic phase of AE, the  
780 *E. multilocularis* metacestode should be in contact with elevated levels of host FGF that can  
781 continuously support parasite growth and proliferation.

782 Using the *Xenopus* expression system we clearly showed that all three identified FGF  
783 receptors of *E. multilocularis* are functionally active kinases that are capable of inducing  
784 GVBD when properly stimulated. We also demonstrated that all three *Echinococcus* kinases  
785 are responsive to human FGF1 and FGF2, albeit to somewhat different extent. While 10 nM  
786 FGF1 fully stimulated both EmFR1 and EmFR2, EmFR3 was less activated than the other  
787 receptors by both FGFs. This does not necessarily indicate, however, that human FGFs bind  
788 less well to EmFR3 than to the other two receptors. Instead, EmFR3 might be activated to a  
789 lesser extent since two tyrosine residues, Y653 and Y654, which in human FGFR1 are  
790 necessary for full activation of the receptor [35], are conserved in EmFR1 and EmFR2 but  
791 absent in EmFR3 (Fig S2). In any case, our data clearly show that particularly human FGF1,  
792 but also human FGF2, are capable of activating the parasite receptors. Since the parasite  
793 apparently does not produce intrinsic FGF ligands, the only canonical FGFs it encounters  
794 during liver invasion are host derived. It is, thus, logical to assume that the effects of FGF1  
795 and FGF2 on parasite growth and development are mediated by one, two or all three  
796 *Echinococcus* FGF receptors. In line with this assumption is the stimulation of the parasite's  
797 Erk-like MAPK cascade module upon exogenous addition of host FGF to metacestode  
798 vesicles. In mammals, the two prominent downstream signalling pathways of FGF receptors  
799 are the Ras-Raf-MAPK cascade and the PI3K/Akt pathway, while two others are STAT

800 signalling and the phospholipase  $\gamma$  (PLC $\gamma$ ) pathway [15]. The STAT signalling pathway is  
801 absent in *Echinococcus* [14] and PLC $\gamma$  involves binding to human FGF receptors at tyrosine  
802 residues that are not conserved in the *Echinococcus* receptors. We had previously  
803 demonstrated that the PI3K/Akt pathway exists in *Echinococcus* [11] but we could not  
804 measure differential phosphorylation of EmAKT in response to exogenous FGF or after  
805 metacestode vesicle treatment with BIBF 1120 (data not shown), indicating that in contrast to  
806 human cells, *Echinococcus* mainly involves the MAPK cascade pathway for downstream FGF  
807 signalling.

808 Concerning cellular expression patterns we detected significant differences between the  
809 *Echinococcus* FGF receptors and those of the related schistosomes and planaria. In planaria,  
810 the expression of FGF receptors is a hallmark of neoblast stem cells and also occurs in  
811 cephalic ganglions [21,23]. In schistosomes, one of the two FGF receptors, *fgfrA*, is a marker  
812 for a prominent subset of somatic stem cells [25-27] and, like *fgfrB*, is also expressed in the  
813 reproductive organs [24]. In *Echinococcus*, we found only one receptor, EmFR3, which is  
814 expressed in germinative cells, but only in a very tiny subpopulation. EmFR2 was also only  
815 expressed in a few cells which were, however, clearly post-mitotic and most probably  
816 represented muscle cells. Likewise, the third *Echinococcus* FGF receptor, EmFR1, was  
817 expressed throughout the parasite's metacestode tissue without specific association with the  
818 germinative cells. In qRT-PCR analyses on metacestode 'vesicles which were specifically  
819 deprived of stem cells after treatment with hydroxyurea [6] or the Polo-like kinase inhibitor  
820 Bi 2536 [42] we also never observed diminished levels of *emfr1* expression (data not shown),  
821 which further supports that the gene is not exclusively expressed in germinative cells. Taken  
822 together, these data indicate that the close association of FGF receptor expression with stem  
823 cells as observed in planaria and schistosomes is at least highly modified in the *Echinococcus*  
824 system, in which at least EmFR1 and EmFR2 are clearly expressed in post-mitotic cells. This

825 adds to stem cell-specific gene expression differences which we had previously observed  
826 between planaria and cestodes e.g. concerning *argonaute* or histone deacetylase-orthologs [6],  
827 and also indicates clear differences between stem cell – specific gene expression patterns in  
828 the parasitic flatworm lineages of trematodes and cestodes.

829 We observed clear inhibitory effects of the tyrosine kinase inhibitor BIBF 1120 on the  
830 enzymatic activity of all three *Echinococcus* FGF receptors upon heterologous expression in  
831 the *Xenopus* system and also demonstrated that this compound can profoundly affect parasite  
832 survival and development *in vitro*. Since in the *Xenopus* system concentrations of 20  $\mu$ M  
833 BIBF 1120 fully inhibited all three *Echinococcus* FGF receptors we cannot clearly state  
834 whether the detrimental effects on parasite development were due to the specific inhibition of  
835 one of the three *Echinococcus* FGF receptors, or on combined activities against all three  
836 enzymes. However, based on the fact that EmFR3 is only expressed in less than 1% of the  
837 cells of the metacestode, that *emfr3* expressing cells only accumulate during the formation of  
838 protoscoleces, and that EmFR3 showed lowest levels of inhibition upon expression in  
839 *Xenopus* cells, we do not consider this receptor as a prominent candidate for mediating the  
840 BIBF 1120 effects on primary cells and the metacestode. We also consider it unlikely that the  
841 inhibition of EmFR2 had produced these effects since the respective gene is only expressed in  
842 a small subset (2-5%) of all metacestode cells. Based on the expression of *emfr2* in muscle  
843 cells or muscle cell progenitors, however, we cannot completely rule out that EmFR2  
844 inhibition might have led to the depletion of specific parasite cells that are necessary to form a  
845 stem cell niche for the parasite's germinative cells. At least in planaria it has already been  
846 shown that muscle cells provide important positional information on the stem cell population  
847 [58] and our recent studies on the *wnt* signalling pathway in *Echinococcus* clearly  
848 demonstrated that this is also the case for cestodes [44]. However, based on the fact that *emfr1*  
849 is expressed throughout the metacestode and that in both primary cells and metacestode

850 vesicles *emfr1* is the highest expressed FGF receptor gene we propose that most of the effects  
851 of BIBF 1120 on *Echinococcus* development are mediated by EmFR1 inhibition. For the  
852 development of novel chemotherapeutics against AE, EmFR1 and EmFR2 would thus be  
853 highly interesting target molecules although, of course, BIBF 1120 as originally developed  
854 against human FGF receptors showed somewhat higher activities against FGFR1 in the  
855 *Xenopus* expression system than against the parasite FGF receptors. Nevertheless, and using  
856 the activity assays developed in this work, it should be possible to identify compounds which  
857 are related to BIBF 1120 but which show higher affinities against the parasite enzymes than  
858 against human FGF receptors.

## 859 **Conclusions**

860 In the present work we provide clear evidence that human FGF ligands are capable of  
861 activating evolutionarily conserved tyrosine kinases of the FGF receptor family that are  
862 expressed by the larval stage of *E. multilocularis* and that the parasite's Erk-like MAPK  
863 cascade is stimulated upon exogenous addition of human FGFs to metacestode vesicles. We  
864 also showed that human FGF1 and FGF2 are stimulating the development of metacestode  
865 vesicles from parasite primary cell cultures and that they accelerate metacestode vesicle  
866 proliferation and growth in vitro. Since FGF1 and FGF2 are expressed in considerable  
867 amounts within the host liver, the primary target organ for the establishment of the *E.*  
868 *multilocularis* metacestode, and since FGF ligands are also constantly produced during liver  
869 regeneration and fibrosis, which are consequences of parasite growth within the intermediate  
870 host, we consider the observed *in vitro* effects on parasite FGF signalling and metacestode  
871 development also of high relevance *in vivo*. Liver-specific activities of host FGF could thus  
872 support the development of metacestode vesicles from stem cells that are delivered to the liver  
873 by the oncosphere larva, and could constantly stimulate asexual proliferation of the  
874 metacestode during an infection. We finally showed that at least one compound that inhibits

875 the activities of mammalian FGF receptors, BIBF 1120, also inhibits the parasite orthologs,  
876 leads to metacestode inactivation, and prevents parasite development of stem cell-containing  
877 primary cell cultures. This opens new ways for the development of anti-*Echinococcus* drugs  
878 using the parasite FGF receptors as target molecules.

879

## 880 **Acknowledgements**

881 The authors thank Monika Bergmann and Dirk Radloff for technical support.

882

## 883 **References**

884 [1] Kern P, Menezes da Silva A, Akhan O, Müllhaupt B, Vizcaychipi KA, Budke C, Vuitton  
885 DA. The echinococcoses: diagnosis, clinical management and burden of disease. *Adv*  
886 *Parasitol.* 2017;96:259-369.

887 [2] Thompson RCA. Biology and systematics of *Echinococcus*. *Adv Parasitol.* 2017;95:65-  
888 109.

889 [3] Brehm K, Koziol U. *Echinococcus*-host interactions at cellular and molecular levels. *Adv*  
890 *Parasitol.* 2017;95:147-212.

891 [4] Gottstein B, Soboslay P, Ortona E, Wang J, Siracusano A, Vuitton DA. Immunology of  
892 alveolar and cystic echinococcosis (AE and CE). *Adv Parasitol.* 2017;96:1-54.

893 [5] Anthony B, Allen JT, Li YS, McManus DP. Hepatic stellate cells and parasite-induced  
894 liver fibrosis. *Parasit Vectors.* 2010;3:60.

- 895 [6] Koziol U, Rauschendorfer T, Zanon-Rodriguez L, Krohne G, Brehm K. The unique stem  
896 cell system of the immortal larva of the human parasite *Echinococcus multilocularis*.  
897 Evodevo. 2014;5:10.
- 898 [7] Spiliotis M, Tappe D, Sesterhenn L, Brehm K. Long-term *in vitro* cultivation of  
899 *Echinococcus multilocularis* metacestodes under axenic conditions. Parasitol Res.  
900 2004;92:430-2.
- 901 [8] Spiliotis M, Lechner S, Tappe D, Scheller C, Krohne G, Brehm K. Transient transfection  
902 of *Echinococcus multilocularis* primary cells and complete *in vitro* regeneration of  
903 metacestode vesicles. Int J Parasitol. 2008;38:1025-39.
- 904 [9] Spiliotis M, Brehm K. Axenic *in vitro* cultivation of *Echinococcus multilocularis*  
905 metacestode vesicles and the generation of primary cell cultures. Methods Mol Biol.  
906 2009;470:245-62.
- 907 [10] Spiliotis M, Mizukami C, Oku Y, Kiss F, Brehm K, Gottstein B. *Echinococcus*  
908 *multilocularis* primary cells: improved isolation, small-scale cultivation and RNA  
909 interference. Mol Biochem Parasitol. 2010;174:83-7.
- 910 [11] Hemer S, Konrad C, Spiliotis M, Koziol U, Schaack D, Förster S, et al. Host insulin  
911 stimulates *Echinococcus multilocularis* insulin signalling pathways and larval development.  
912 BMC Biol 2014;12:5.
- 913 [12] Spiliotis M, Kroner A, Brehm K. Identification, molecular characterization and  
914 expression of the gene encoding the epidermal growth factor receptor orthologue from the  
915 fox-tapeworm *Echinococcus multilocularis*. Gene. 2003;323:57-65.

- 916 [13] Cheng Z, Liu F, Li X, Dai M, Wu J, Guo X, et al. EGF-mediated EGFR/ERK signaling  
917 pathway promotes germinative cell proliferation in *Echinococcus multilocularis* that  
918 contributes to larval growth and development. PLoS Negl Trop Dis. 2017;11:e0005418.
- 919 [14] Tsai IJ, Zarowiecki M, Holroyd N, Garciarrubio A, Sanchez-Flores A, Brooks KL, et al.  
920 The genomes of four tapeworm species reveal adaptations to parasitism. Nature. 2013;496:57-  
921 63.
- 922 [15] Ornitz DM, Itoh N. The fibroblast growth factor signaling pathway. WIREs Dev Biol.  
923 2015;4:215-66.
- 924 [16] Oulion S, Bertrand S, Escriva H. Evolution of the FGF gene family. Int J Evol Biol.  
925 2012;2012:298147.
- 926 [17] Nagasaki T, Lieberman MA. Liver contains heparin-binding growth factors as the major  
927 growth factor for cultured fibroblasts. Hepatology 1991;13:6-14.
- 928 [18] Steiling H, Wüstefeld T, Bugnon P, Brauchle M, Fässler R, Teupser D, et al. Fibroblast  
929 growth factor receptor signalling is crucial for liver homeostasis and regeneration. Oncogene.  
930 2003;22:4380-8.
- 931 [19] Kan M, Huang J, Mansson PE, Yasumitsu H, Carr B, McKeehan WL. Heparin-binding  
932 growth factor type 1 (acidic fibroblast growth factor): a potential biphasic autocrine and  
933 paracrine regulator of hepatocyte regeneration. Proc Natl Acad Sci USA. 1989;86:7432-6.
- 934 [20] Schumacher JD, Guo GL. Regulation of hepatic stellate cells and fibrogenesis by  
935 fibroblast growth factors. Biomed Res Int. 2016;2016:8323747.
- 936 [21] Ogawa K, Kobayashi C, Hayashi T, Orii H, Watanabe K, Agata K. Planarian fibroblast  
937 growth factor receptor homologs expressed in stem cells and cephalic ganglions. Develop  
938 Growth Differ. 2002;44:191-204.



- 939 [22] Cebriá F, Kobayashi C, Umesono Y, Nakazawa M, Mineta K, Ikeo K, et al. FGFR-  
940 related gene *nou-darake* restricts brain tissues to the head region of planarians. *Nature*.  
941 2002;419:620-4.
- 942 [23] Wagner DE, Ho JJ, Reddien PW. Genetic regulators of a pluripotent adult stem cell  
943 system in planarians identified by RNAi and clonal analysis. *Cell Stem Cell*. 2012;10:299-  
944 311.
- 945 [24] Hahnel S, Quack T, Parker-Manuel SJ, Lu Z, Vanderstraete M, Morel M, et al. Gonad  
946 RNA-specific qRT-PCR analyses identify genes with potential functions in schistosome  
947 reproduction such as *SmFz1* and *SmFGFRs*. *Front Genet*. 2014;5:170.
- 948 [25] Wang B, Collins JJ 3<sup>rd</sup>, Newmark PA. Functional genomic characterization of neoblast-  
949 like stem cells in larval *Schistosoma mansoni*. *Elife* 2013;2:e00768.
- 950 [26] Wendt GR, Collins JNR, Pei J, Pearson MS, Bennett HM, Loukas A, et al. Flatworm-  
951 specific transcriptional regulators promote the specification of tegumental progenitors in  
952 *Schistosoma mansoni*. *Elife*. 2018;7:e33221.
- 953 [27] Wang B, Lee J, Li P, Saberi A, Yang H, Liu C, et al. Stem cell heterogeneity drives the  
954 parasitic life cycle of *Schistosoma mansoni*. *Elife*.2018;7:e35449.
- 955 [28] Parkinson J, Wasmuth JD, Salinas G, Bizarro CV, Sanford C, Berriman M, et al. A  
956 transcriptome analysis of *Echinococcus granulosus* larval stages: implications for parasite  
957 biology and host adaptation. *PLoS Negl Trop Dis*. 2012;6:e1897.
- 958 [29] Brehm K, Wolf M, Beland H, Kroner A, Frosch M. Analysis of differential gene  
959 expression in *Echinococcus multilocularis* larval stages by means of spliced leader  
960 differential display. *Int J Parasitol*. 2003;33:1145-59.

- 961 [30] Konrad C, Kroner A, Spiliotis M, Zavala-Gongora R, Brehm K. Identification and  
962 molecular characterization of a gene encoding a member of the insulin receptor family in  
963 *Echinococcus multilocularis*. Int J Parasitol. 2003;33:301-12.
- 964 [31] Vicogne J, Cailliau K, Tulasne D, Browaeys E, Yan YT, Fafeur V, et al. Conservation of  
965 epidermal growth factor receptor function in the human parasitic helminth *Schistosoma*  
966 *mansoni*. J Biol Chem. 2004;279:37407-14.
- 967 [32] Browaeys-Poly E, Cailliau K, Vilain JP. Signal transduction pathways triggered by  
968 fibroblast growth factor receptor 1 expressed in *Xenopus laevis* oocytes after fibroblast  
969 growth factor 1 addition. Role of Grb2, phosphatidylinositol 3-kinase, Src tyrosine kinase,  
970 and phospholipase Cgamma. Eur J Biochem. 2000;267:6253-63.
- 971 [33] Spiliotis M, Konrad C, Gelmedin V, Tappe D, Brückner S, Mösch HU, Brehm K.  
972 Characterization of EmMPK1, an ERK-like MAP kinase from *Echinococcus multilocularis*  
973 which is activated in response to human epidermal growth factor. Int J Parasitol.  
974 2006;36:1097-1112.
- 975 [34] Hanks SK, Hunter T. The eukaryotic protein kinase superfamily: kinase (catalytic)  
976 domain structure and classification. FASEB J. 1995;9:576-96.
- 977 [35] Furdui CM, Lew ED, Schlessinger J, Anderson KS. Autophosphorylation of FGFR1  
978 kinase is mediated by a sequential and precisely ordered reaction. Mol Cell. 2006;21:711-7.
- 979 [36] Grassot J, Gouy M, Perriere G, Mouchiroud G. Origin and molecular evolution of  
980 receptor tyrosine kinases with immunoglobulin-like domains. Mol Biol Evol. 2006;23:1232-  
981 41.

- 982 [37] Grohme MA, Schloissnig S, Rozanski A, Pippel M, Young GR, Winkler S, et al. The  
983 genome of *Schmidtea mediterranea* and the evolution of core cellular mechanisms. *Nature*.  
984 2018;554:56-61.
- 985 [38] Berriman M, Haas BJ, LoVerde PT, Wilson RA, Dillon GP, Cerquera GC, et al. The  
986 genome of the blood fluke *Schistosoma mansoni*. *Nature*. 2009;460:352-8.
- 987 [39] Huang P, Stern MJ. FGF signaling in flies and worms: more and more relevant to  
988 vertebrate biology. *Cytokine Growth Factor Rev*. 2005;16:151-8.
- 989 [40] Rentsch F, Fritzenwanker JH, Scholz CB, Technau U. FGF signaling controls formation  
990 of the apical sensory organ in the cnidarian *Nematostella vectensis*. *Development*.  
991 2008;135:1761-9.
- 992 [41] Krishnapati LS, Ghaskadbi S. Identification and characterization of VEGF and FGF from  
993 *Hydra*. *Int J Dev Biol*. 2013;57:897-906.
- 994 [42] Schubert A, Koziol U, Cailliau K, Vanderstraete M, Dissous C, Brehm K. Targeting  
995 *Echinococcus multilocularis* stem cells by inhibition of the Polo-like kinase EmPlk1. *PLoS*  
996 *Negl Trop Dis*. 2014;8:e2870.
- 997 [43] Koziol U, Radio S, Smircich P, Zarowiecki M, Fernandez C, Brehm K. A novel  
998 terminal-repeat retrotransposon in miniature (TRIM) is massively expressed in *Echinococcus*  
999 *multilocularis* stem cells. *Genome Biol Evol*. 2015;7:2136-53.
- 1000 [44] Koziol U, Jarero F, Olson PD, Brehm K. Comparative analysis of Wnt expression  
1001 identifies a highly conserved developmental transition in flatworms. *BMC Biol*. 2016;14:10.
- 1002 [45] Hilberg F, Roth GJ, Krssak M, Kautschitsch S, Sommergruber W, Tontsch-Grunt U, et  
1003 al. BIBF 1120: Triple angiokinase inhibitor with sustained receptor blockade and good  
1004 antitumor efficacy. *Cancer Res*. 2008;68:4774-82.

- 1005 [46] Roth GJ, Binder R, Colbatzky F, Dallinger C, Schlenker-Herceg R, Hilberg F, et al.  
1006 Nintedanib: from discovery to clinic. *J Med Chem.* 2015;58:1053-63.
- 1007 [47] Spiliotis M, Tappe D, Brückner S, Mösch HU, Brehm K. Molecular cloning and  
1008 characterization of Ras- and Raf-homologues from the fox-tapeworm *Echinococcus*  
1009 *multilocularis*. *Mol Biochem Parasitol.* 2005;139:225-237.
- 1010 [48] Gelmedin V, Spiliotis M, Brehm K. Molecular characterization of MEK1/2- and  
1011 MKK3/6-like mitogen-activated protein kinase kinases (MAPKK) from the fox-tapeworm  
1012 *Echinococcus multilocularis*. *Int J Parasitol.* 2010;40:555-67.
- 1013 [49] Adalid-Peralta L, Rosas G, Arce-Sillas A, Bobes RJ, Cardenas G, Hernandez M, et al.  
1014 Effect of transforming growth factor- $\beta$  upon *Taenia solium* and *Taenia crassiceps* cysticerci.  
1015 *Sci Rep.* 2017;7:12345.
- 1016 [50] Zavala-Gongora R, Kroner A, Bernthaler P, Knaus P, Brehm K. A member of the  
1017 transforming growth factor-b-receptor family from *Echinococcus multilocularis* is activated  
1018 by human bone morphogenetic protein. *Mol Biochem Parasitol.* 2006;146:265-71.
- 1019 [51] Ramachandran H, Skelly PJ, Shoemaker CB. The *Schistosoma mansoni* epidermal  
1020 growth factor receptor homologue, SER, has tyrosine kinase activity and is localized in adult  
1021 muscle. *Mol Biochem Parasitol.* 1996;83:1-10.
- 1022 [52] Oliveira KC, Carvalho ML, Verjovski-Almeida S, LoVerde PT. Effect of human TGF- $\beta$   
1023 on the gene expression profile of *Schistosoma mansoni* adult worms. *Mol Biochem Parasitol.*  
1024 2012;183:132-9.
- 1025 [53] Osman A, Niles EG, Verjovski-Almeida S, LoVerde PT. *Schistosoma mansoni* TGF-beta  
1026 receptor II: role in host ligand-induced regulation of a schistosome target gene. *PLoS Pathog.*  
1027 2006;2:e54.

1028 [54] Khayath N, Vicogne J, Ahier A, BenYounes A, Konrad C, Trolet J, et al. Diversification  
1029 of the insulin receptor family in the helminth parasite *Schistosoma mansoni*. FEBS J.  
1030 2007;274:659-76.

1031 [55] You H, Zhang W, Jones MK, Gobert GN, Mulvenna J, Rees G, et al. Cloning and  
1032 characterization of *Schistosoma japonicum* insulin receptors. PLoS One. 2010;5:e9868.

1033 [56] Gottstein B, Dai WJ, Walker M, Stettler M, Müller N, Hemphill A. An intact laminated  
1034 layer is important for the establishment of secondary *Echinococcus multilocularis* infection.  
1035 Parasitol Res. 2002;88:822-8.

1036 [57] Vuitton DA, Guerret-Stocker S, Carbillet JP, Manton G, Miguet JP, Grimaud JA.  
1037 Collagen immunotyping of the hepatic fibrosis in human alveolar echinococcosis. Z  
1038 Parasitenkd. 1986;72:97-104.

1039 [58] Witchley JN, Mayer M, Wagner DE, Owen JH, Reddien PW. Muscle cells provide  
1040 instructions for planarian regeneration. Cell Rep. 2013;4:633-41.

1041

## 1042 **Supporting information captions**

1043 **Fig S1. Amino acid sequences of *E. multilocularis* FGF receptors.** Deduced amino acid  
1044 sequences of all three *E. multilocularis* FGF receptors are shown. After the name of each  
1045 receptor the GenBank accession numbers of the cloned and sequenced cDNAs are shown as  
1046 well as the gene designation according to the *E. multilocularis* genome project. Predicted  
1047 signal peptides are marked in red, predicted IG-domains are marked in blue, tyrosine kinase  
1048 domains are marked in yellow. Transmembrane regions are underlined.

1049

1050 **Fig S2. Amino acid sequence alignment of FGF receptor kinase domains.** Depicted is a  
1051 CLUSTAL W amino acid sequence alignment of the tyrosine kinase domains of *E.*  
1052 *multilocularis* EmFR1 (GenBank accession no. LT599044), EmFR2 (LT599045) and EmFR3  
1053 (LT599046) with those of *Schistosoma mansoni* FGFR1 (SmFGFR1; Wormbase accession  
1054 number: Smp\_175590.1) and FGFR2 (SmFGFR2; Smp\_157300.1), *Dugesia japonica*  
1055 FGFR1 (DjFGFR1; NCBI accession no.: Q8MY86) and FGFR2 (DjFGFR2; BAB92086.1),  
1056 and the human FGFR1 receptor (HsFGFR1; NP\_075598.2). Amino acid residues that are  
1057 identical to the consensus of all sequences are printed in white on black background.  
1058 Numbering to the right starts with amino acid 1 of the tyrosine kinase domain. The insert  
1059 region of the split tyrosine kinase domain is indicated by a grey bar. Amino acids known to be  
1060 highly conserved among tyrosine and serine/threonine kinases [34] are indicated by asterisks  
1061 above the alignment. The two tyrosine residues known to be important for full activation of  
1062 the human FGF receptor [35] are marked by black triangles. The TKD DFG motif which was  
1063 modified to DNA to generate kinase-dead FGF receptors is indicated by black stars below the  
1064 sequence.

1065

1066

1067 **Fig S3. Expression of *E. multilocularis* FGF receptor genes in larval stages.** Indicated are  
1068 fpkm (fragments per kilobase of transcript per million mapped reads) values for *emfr1* (red),  
1069 *emfr2* (orange), and *emfr3* (blue) in *E. multilocularis* primary cell cultures after 2 days of  
1070 incubation (PC2), after 11 days of culture (PC11), in mature metacystode vesicles without  
1071 (MV-) and with (MV+) brood capsules as well as in dormant (PS-) and activated (PS+)  
1072 protoscoleces. Transcriptome data have been generated during the *E. multilocularis* genome  
1073 project and were mapped to the genome as described in [14].

1074

1075 **Fig S4. WMISH analysis of *emfr3* expression during metacestode development.** In all  
1076 panels the WMISH signal is shown in green, and DAPI nuclear staining is shown in blue. **A.**  
1077 Sense probe (negative control). **B.** Early brood capsule formation. **C.** Early protoscolex  
1078 formation. **D.** Detail of early protoscolex formation, showing an *emfr3*<sup>+</sup> cell in the region of  
1079 the stalk connecting the developing protoscolex to the brood capsule. **E.** Detail of early  
1080 protoscolex formation, showing the morphology of an *emfr3*<sup>+</sup> cell (inset: only DAPI channel  
1081 is shown). **F.** Late protoscolex formation. *bc*, brood capsule; *gl*, germinative layer; *ps*,  
1082 protoscolex; *r*, rostellum; *s*, sucker; *st*, stalk. Bars: 25  $\mu$ m for B, C, D and F; 10  $\mu$ m for E.

1083

1084

1085 **Fig S5. Phosphorylation of *E. multilocularis* FGF receptors upon expression in *Xenopus***  
1086 **oocytes.** *E. multilocularis* EmFR2 (EmFR2) and a kinase-dead version of EmFR2 (EmFR2  
1087 TK-) were expressed in *Xenopus* oocytes and stimulated with either 10 nM FGF1 or 10 nM  
1088 FGF2 as indicated. After stimulation, cell lysates were generated, separated by SDS-PAGE  
1089 and analysed by Western blot using antibodies against the myc-tag (Anti-myc; loading  
1090 control) or phosphorylated tyrosine (Anti P<sub>tyr</sub>). Depicted are the results for EmFR2. Results  
1091 for EmFR1 and EmFR3 were comparable.

1092

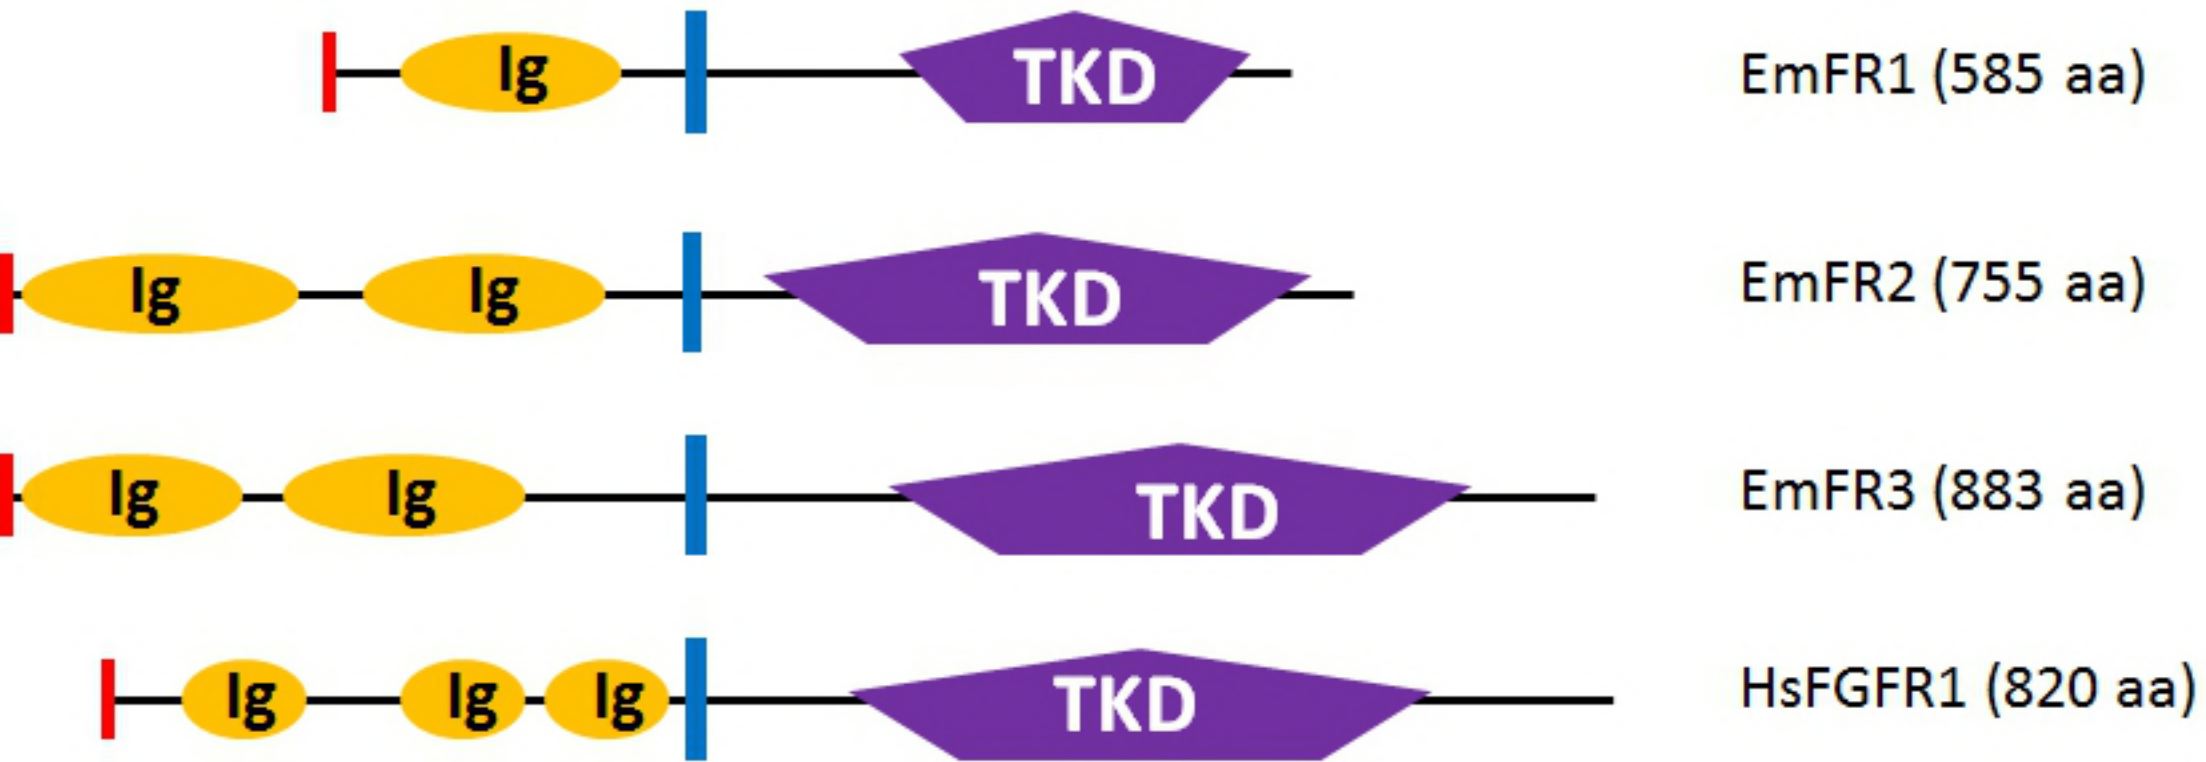

Figure 1



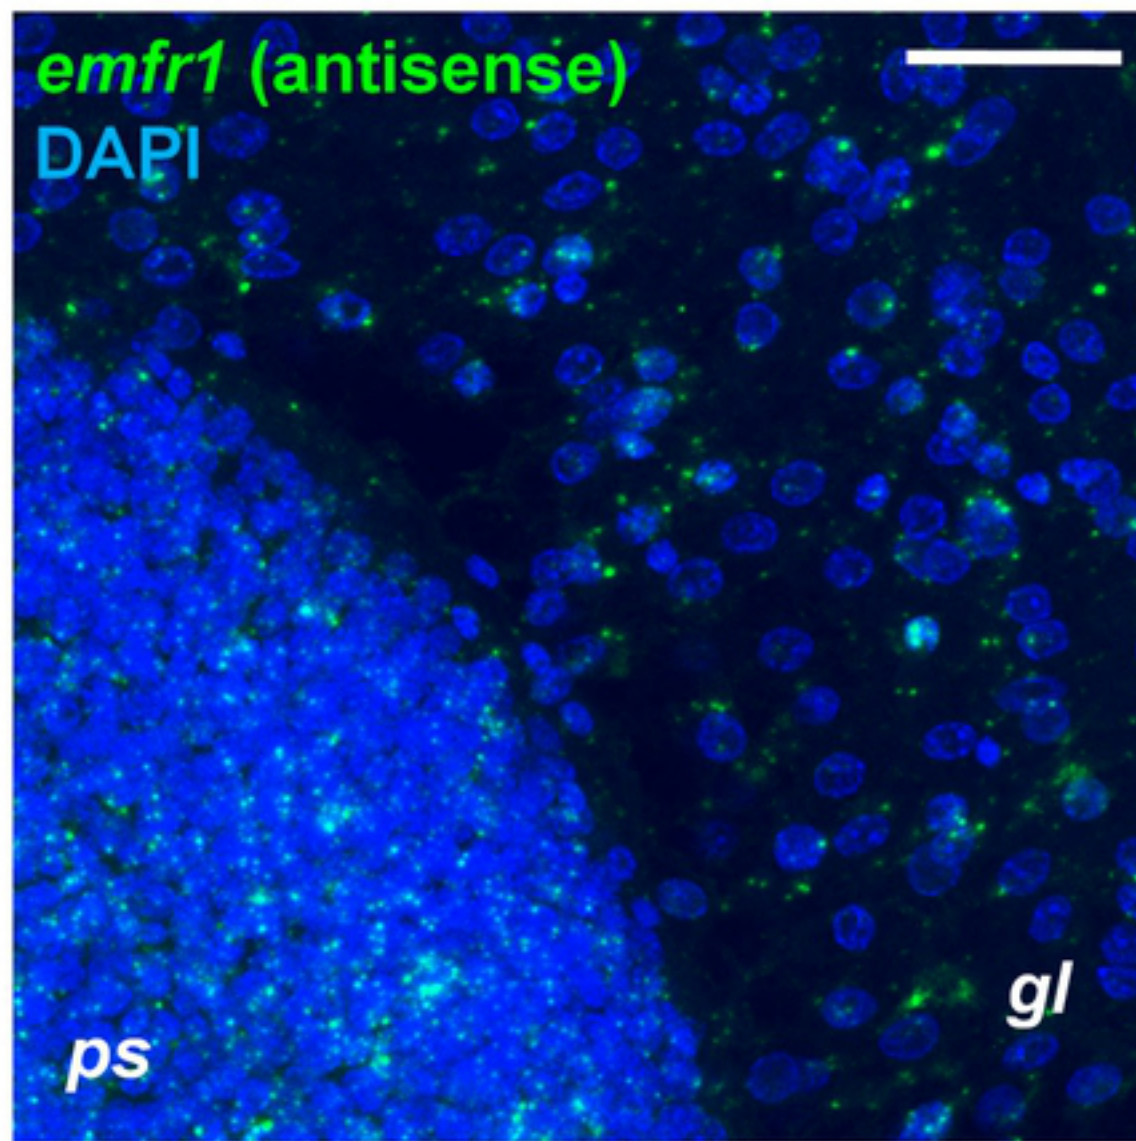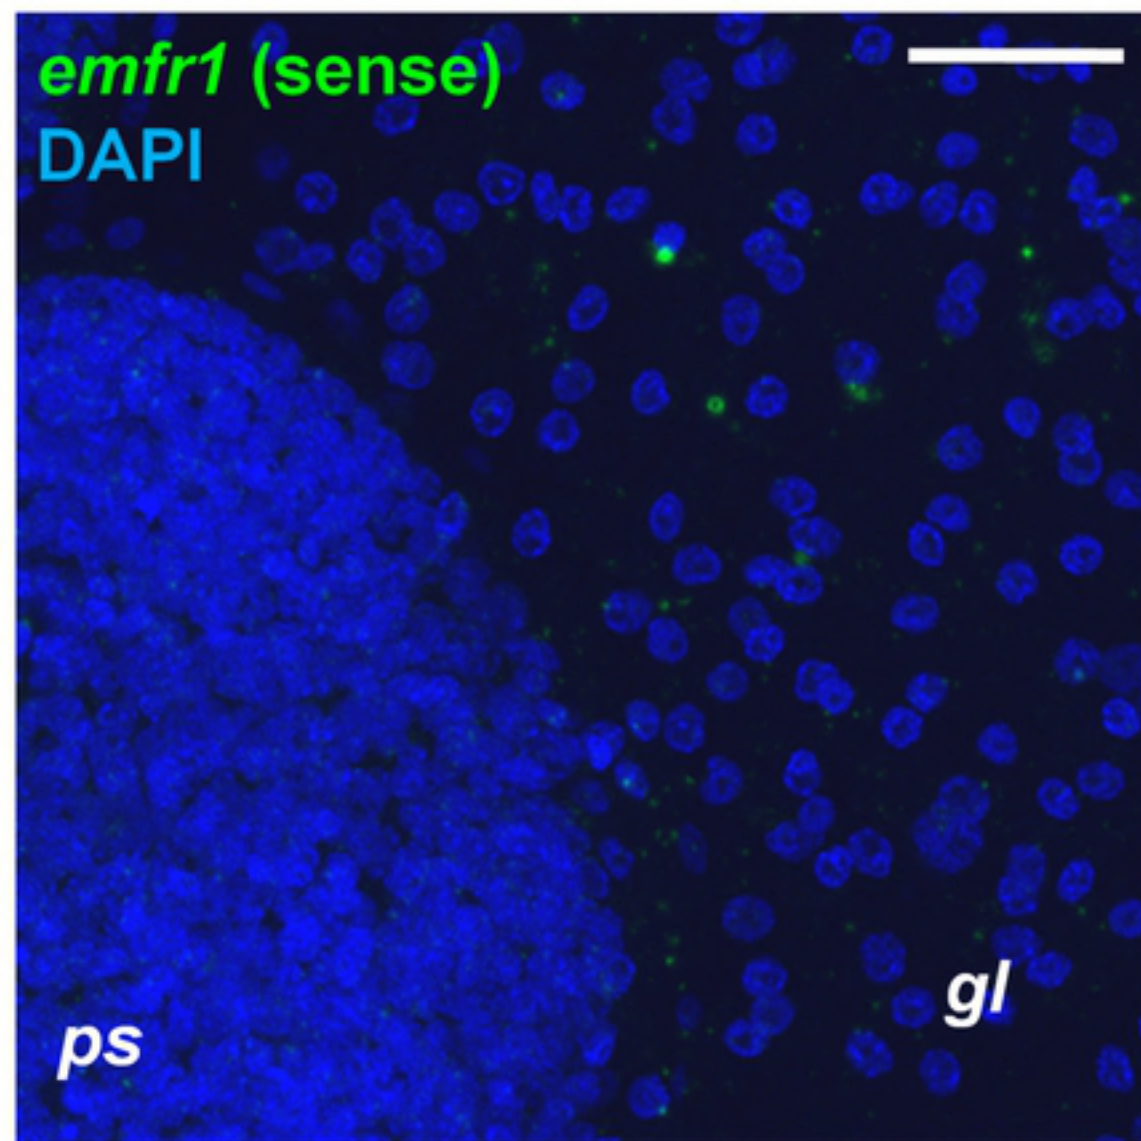

Figure 2

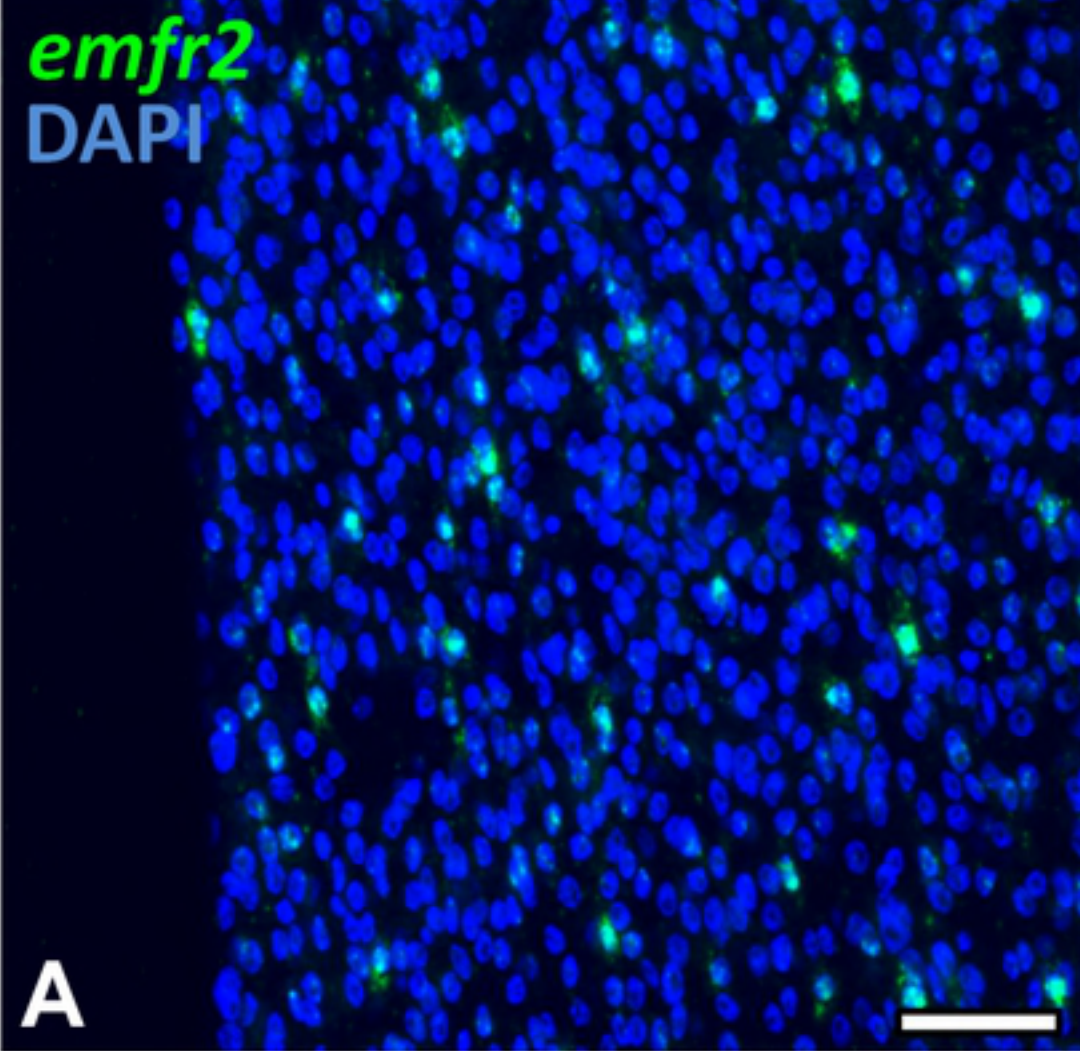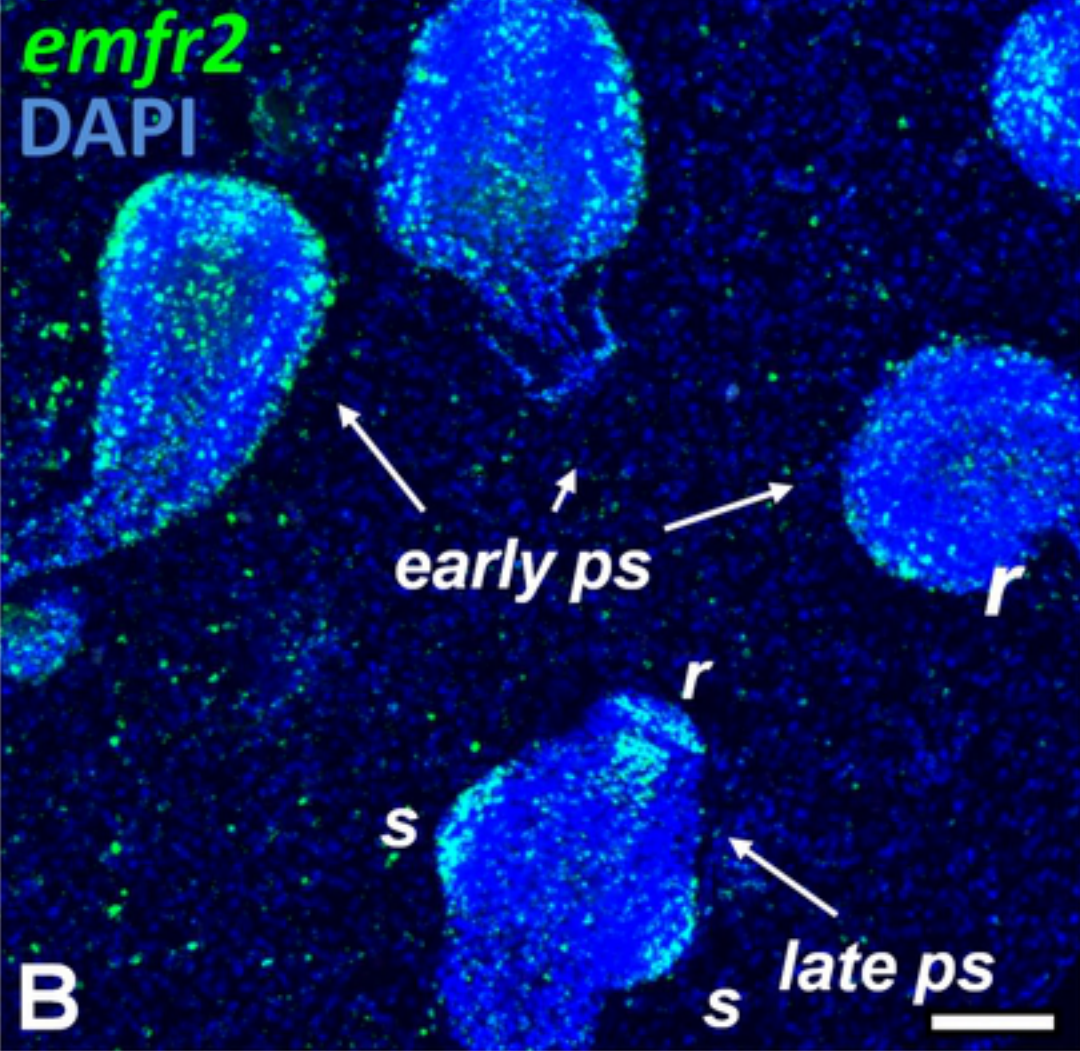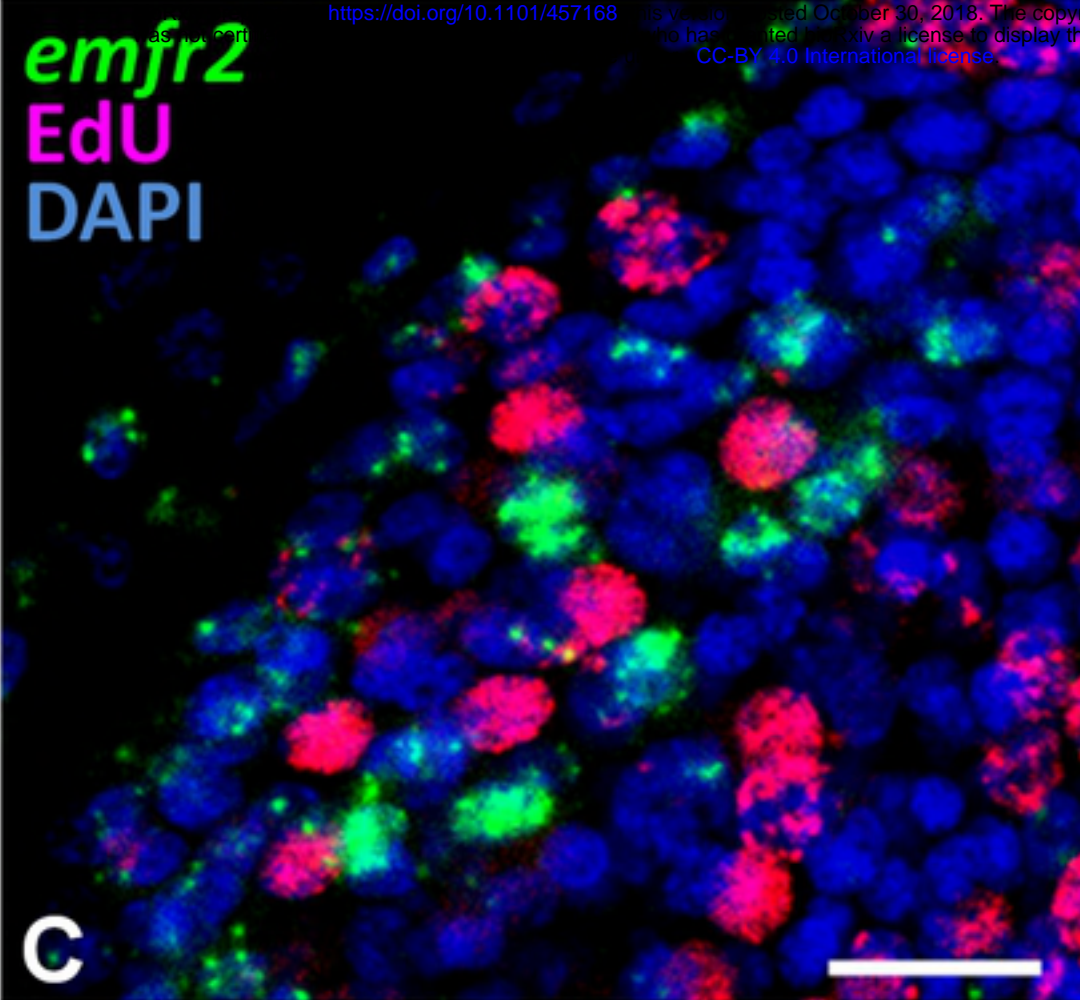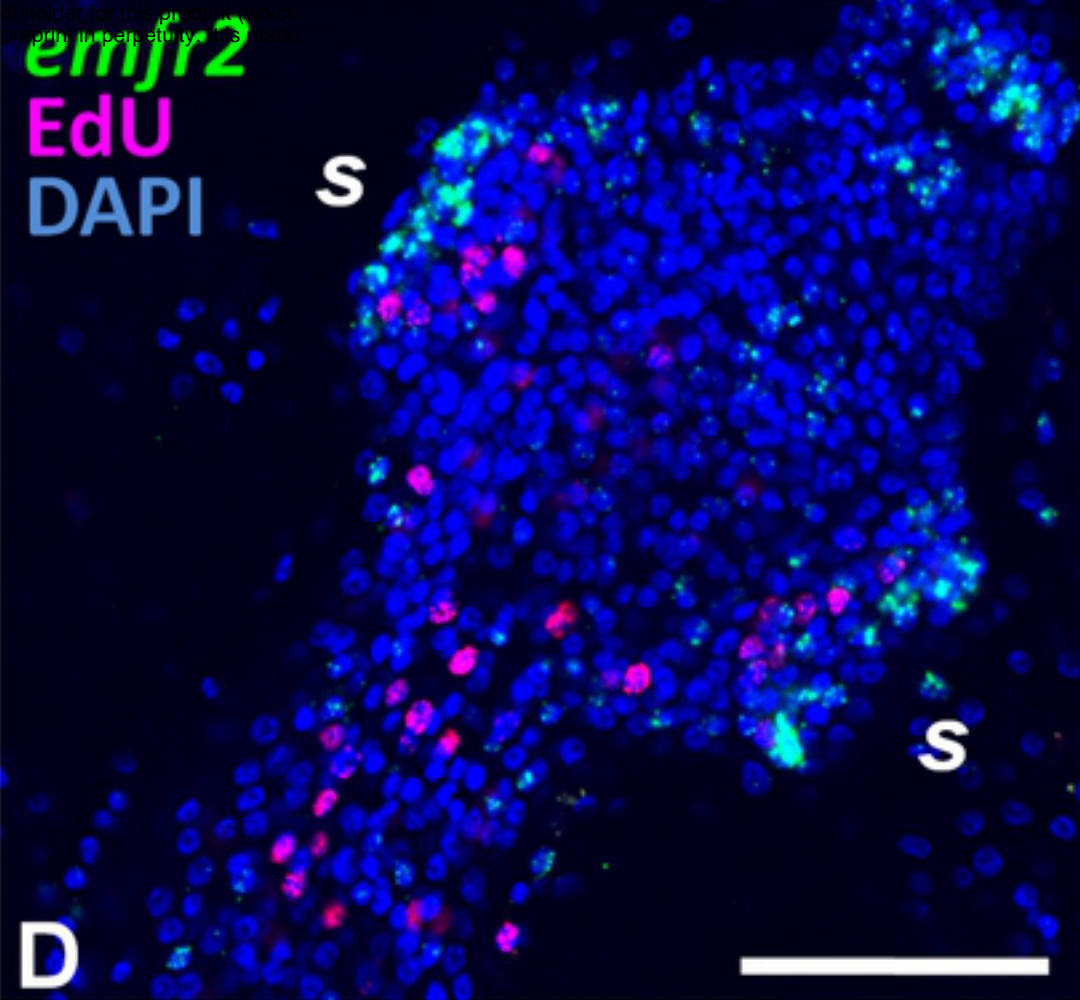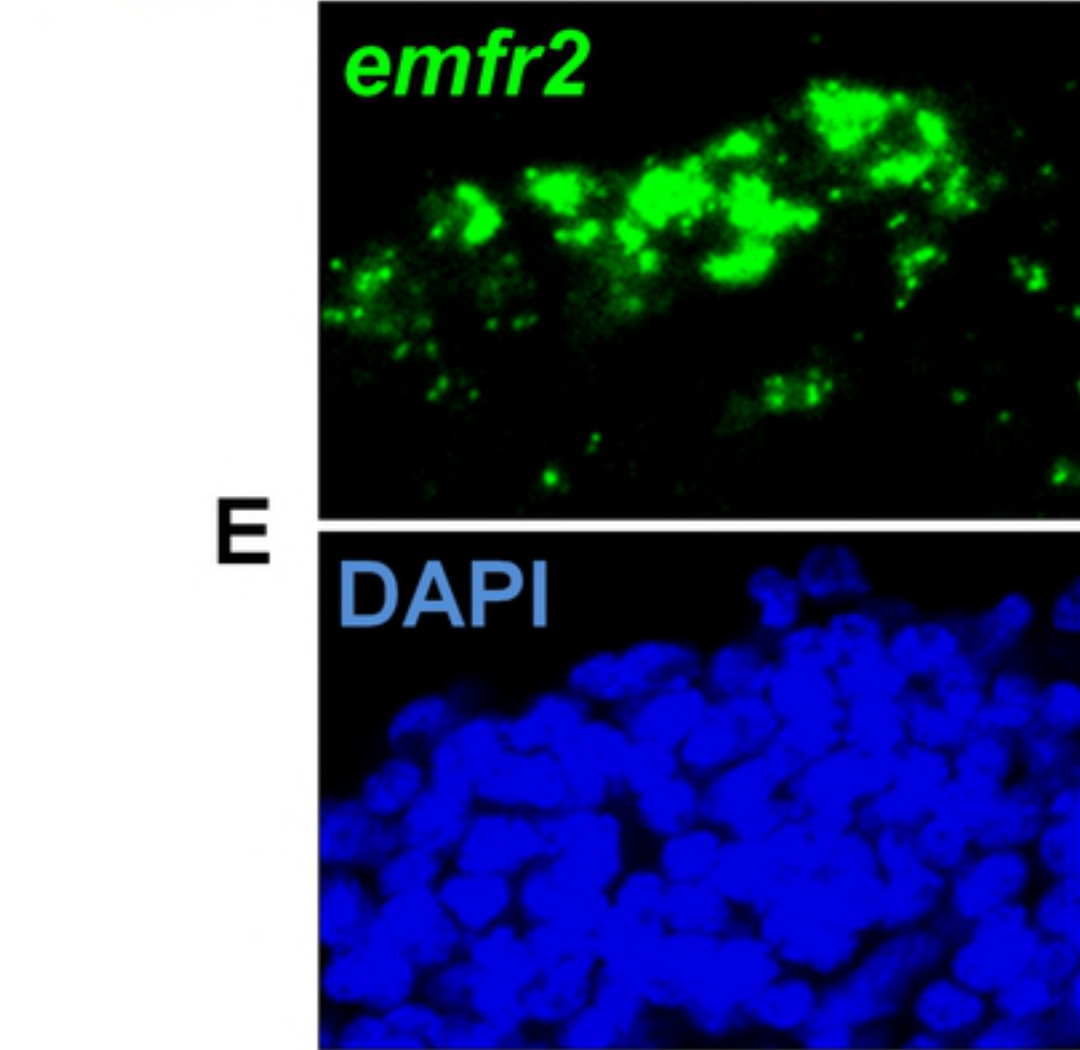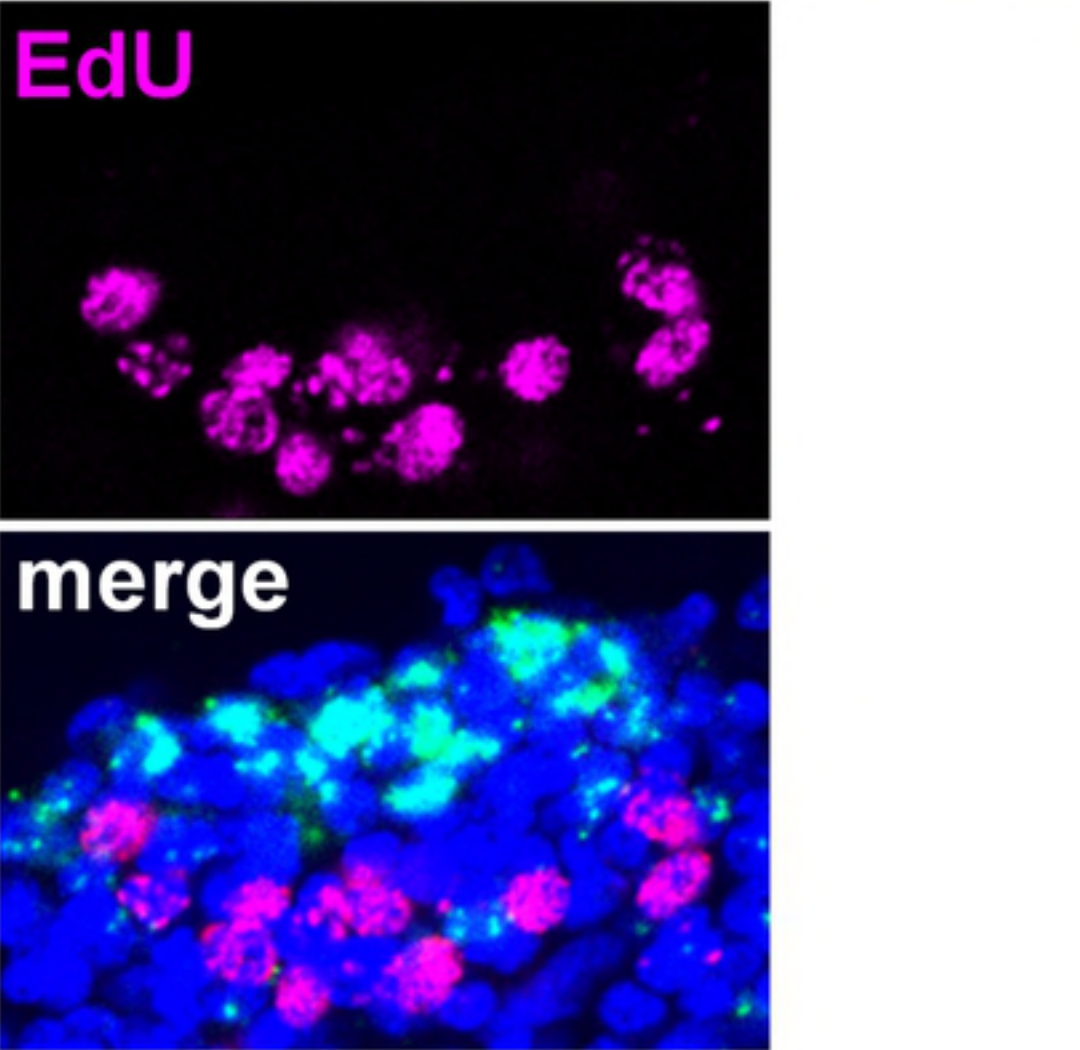

Figure 3

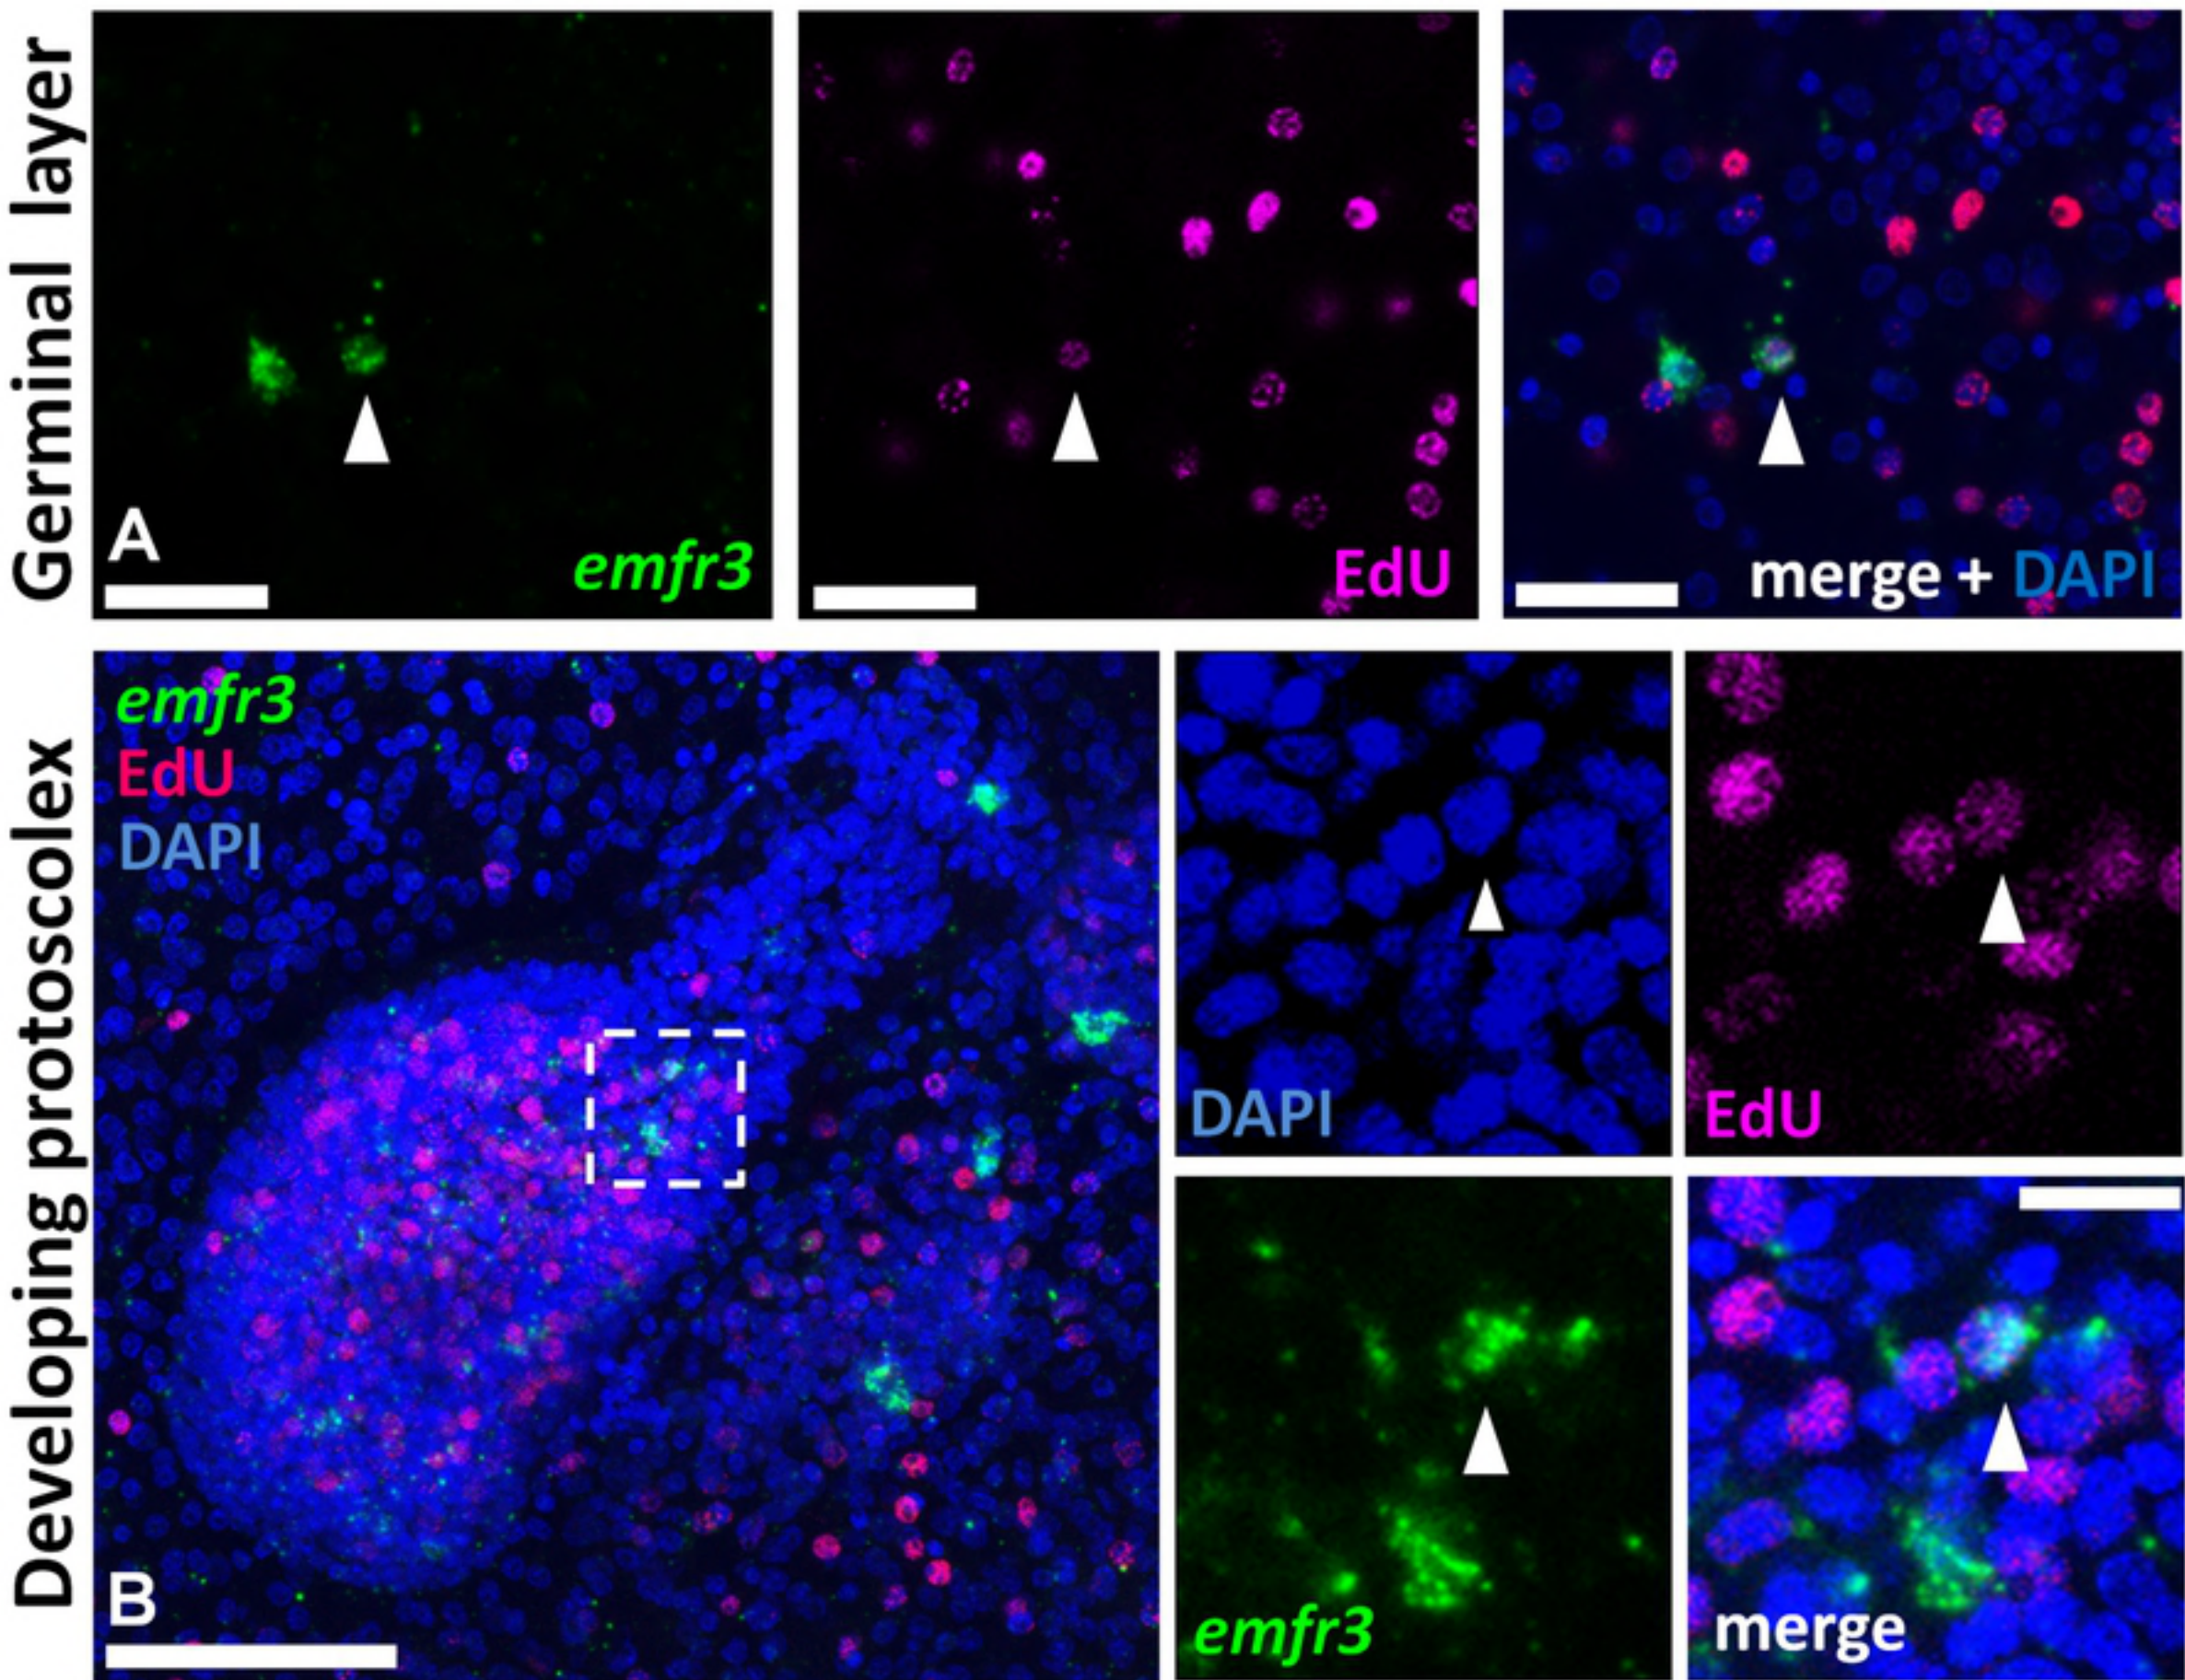

Figure 4

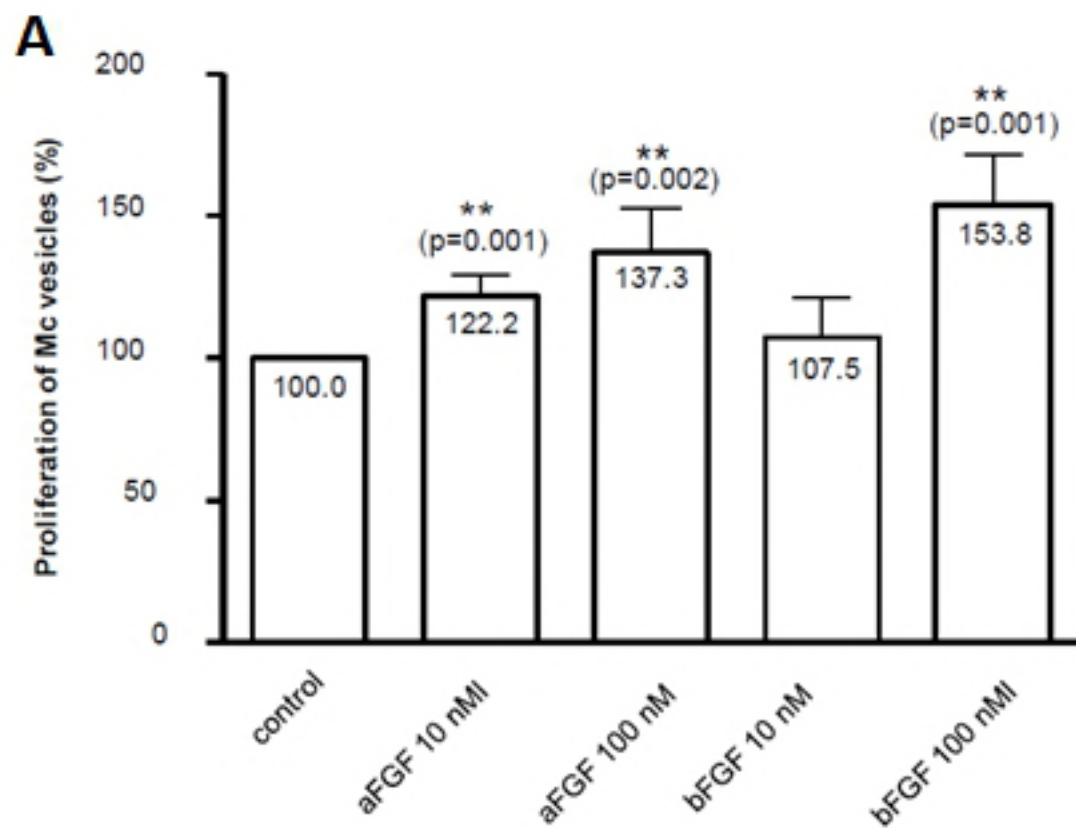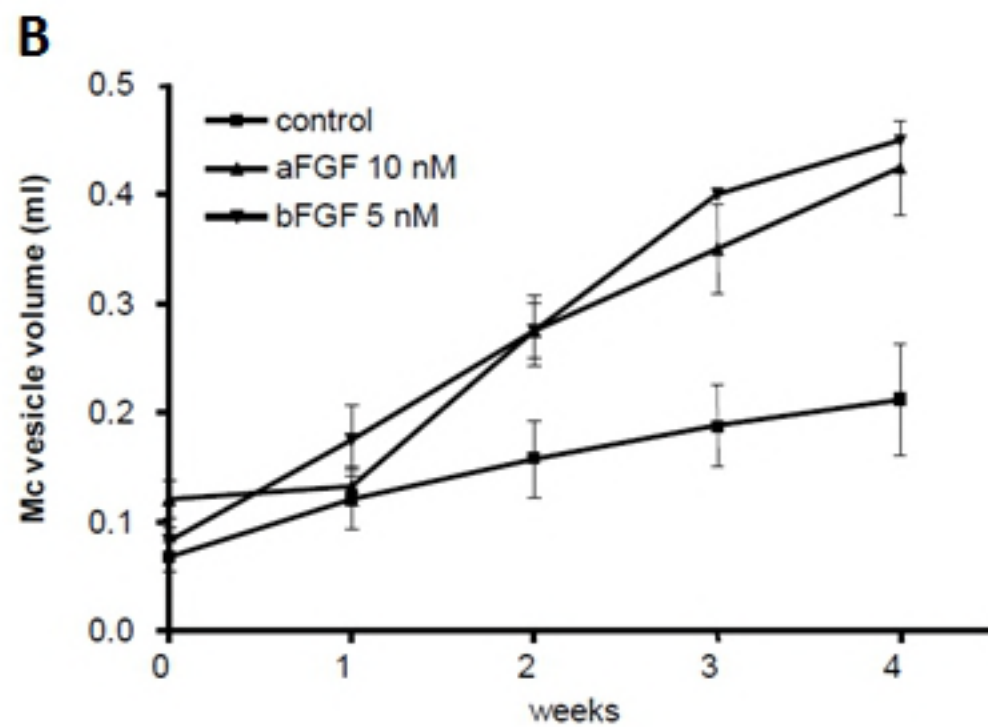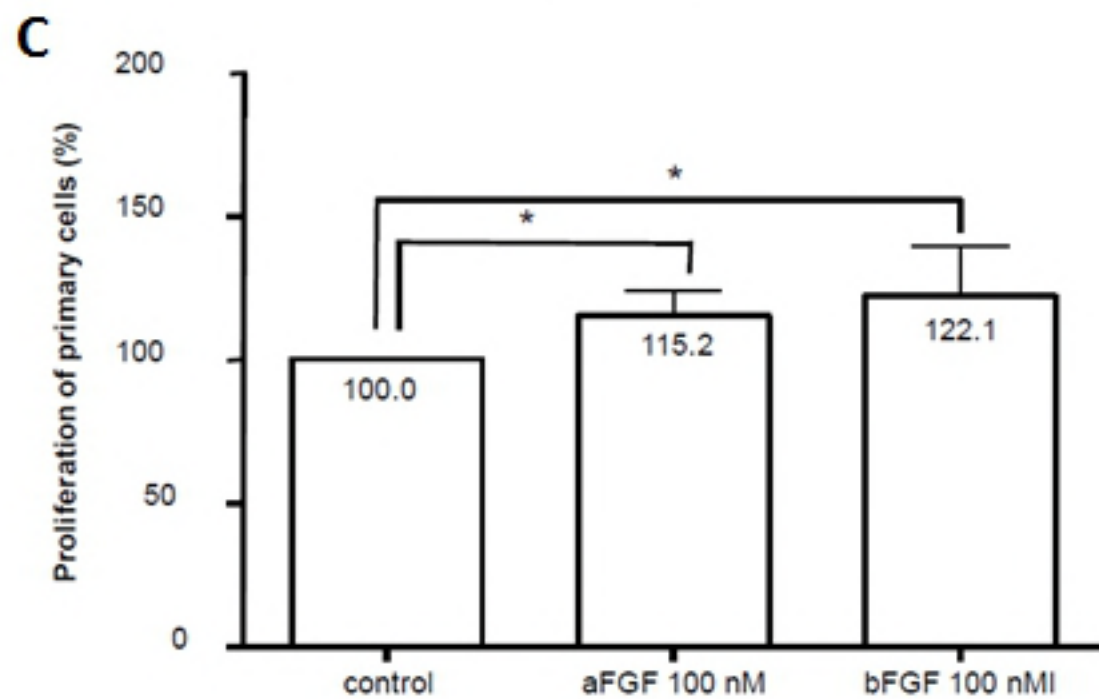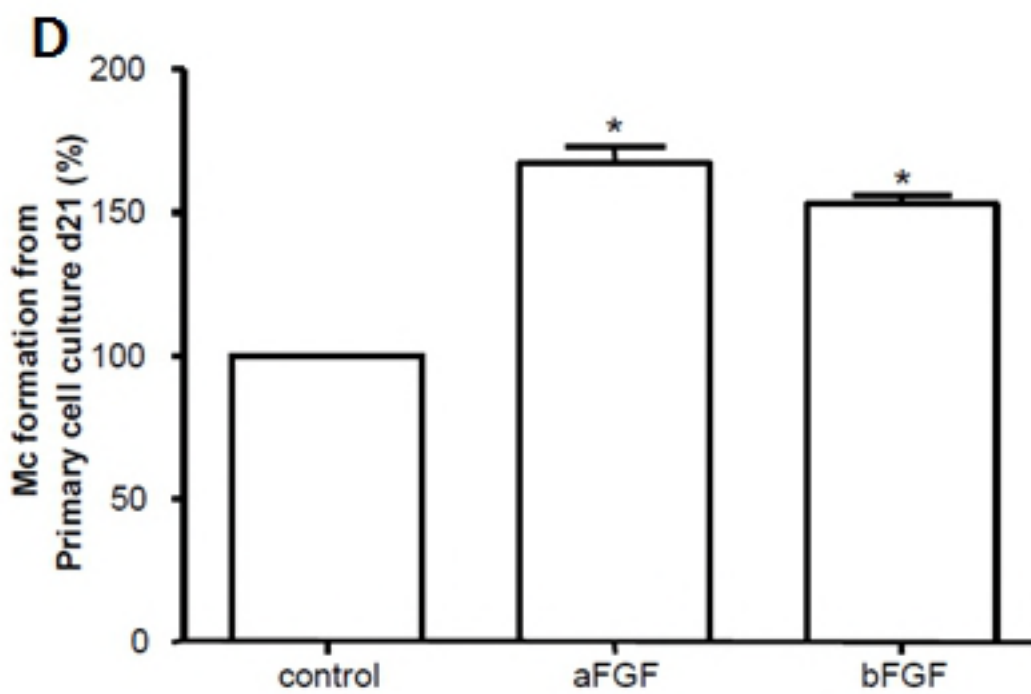

Figure 5

**A**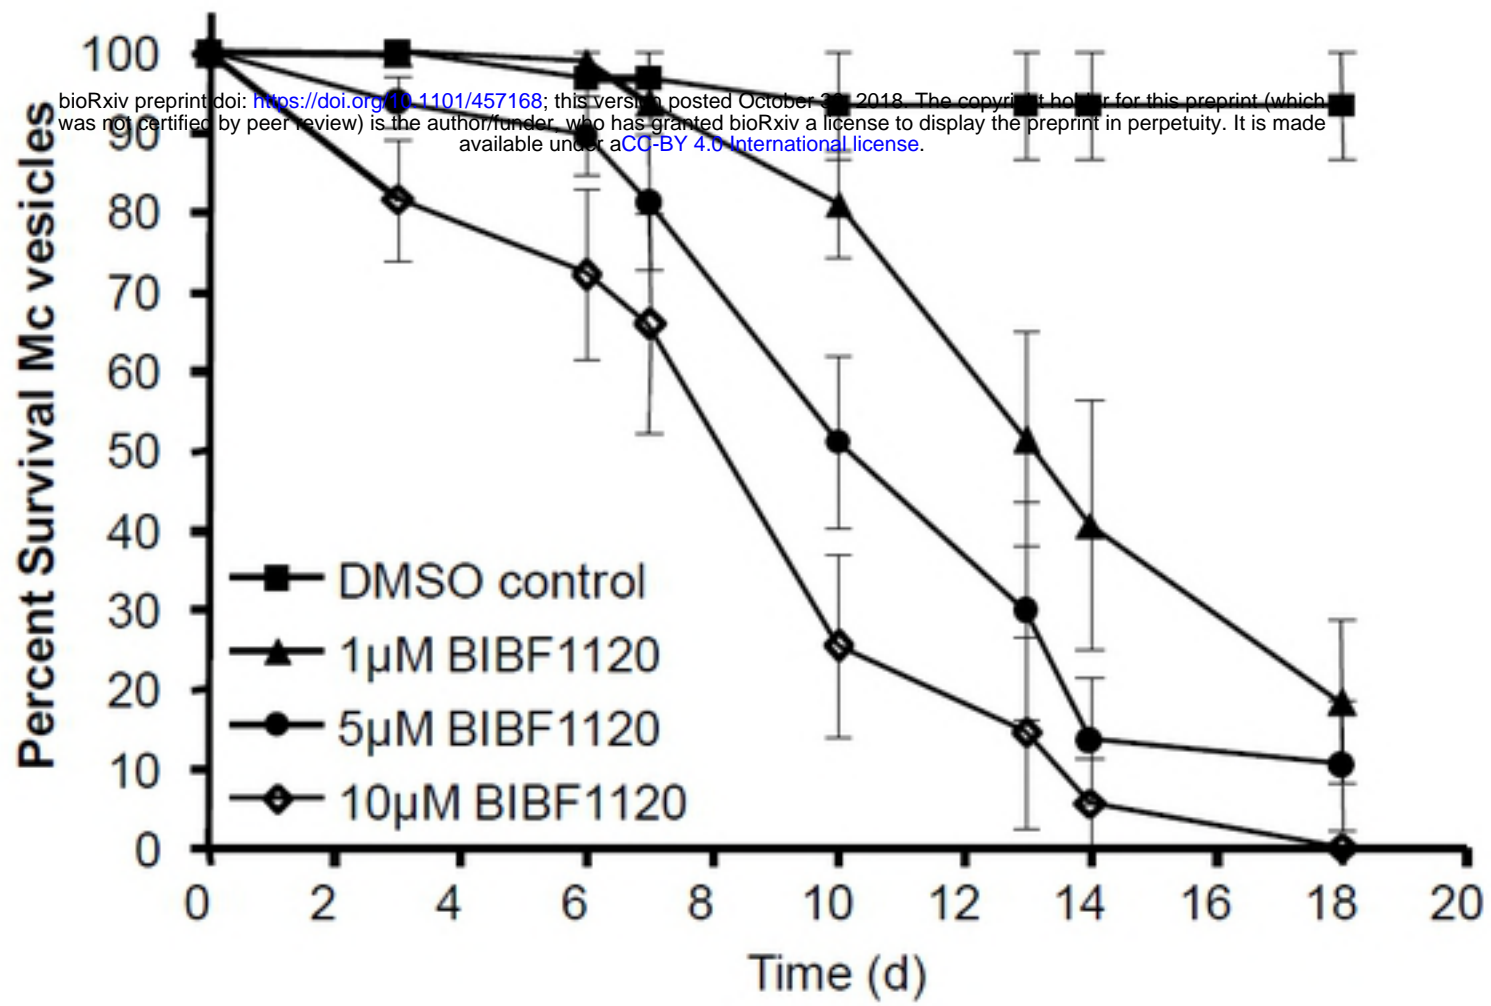**B**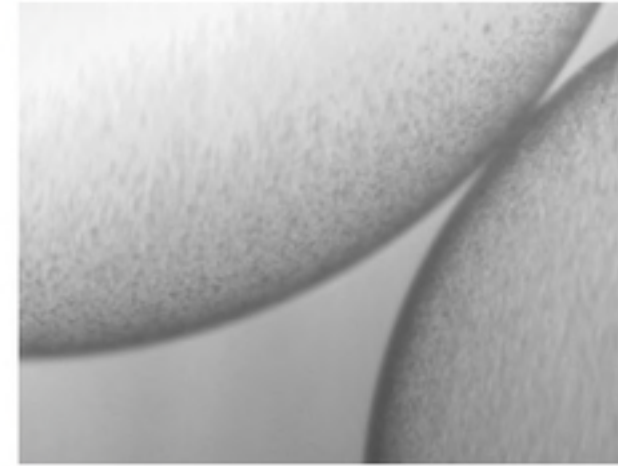**C**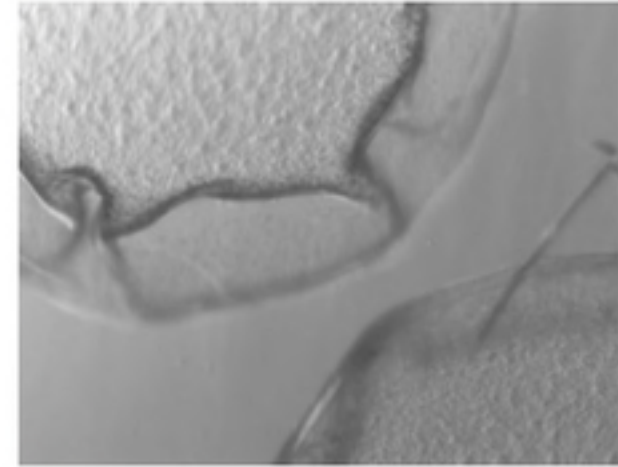**E**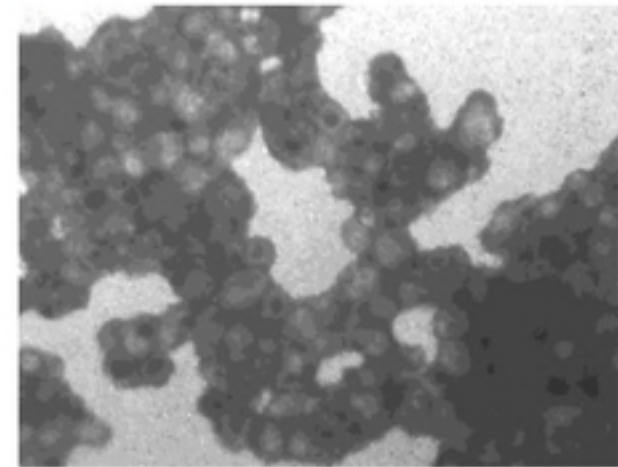**F**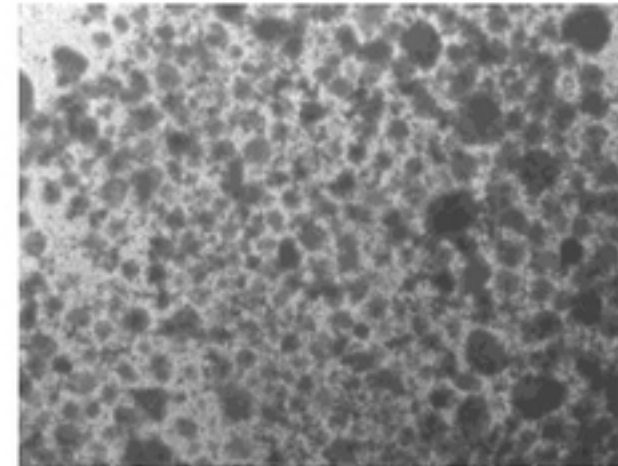**D**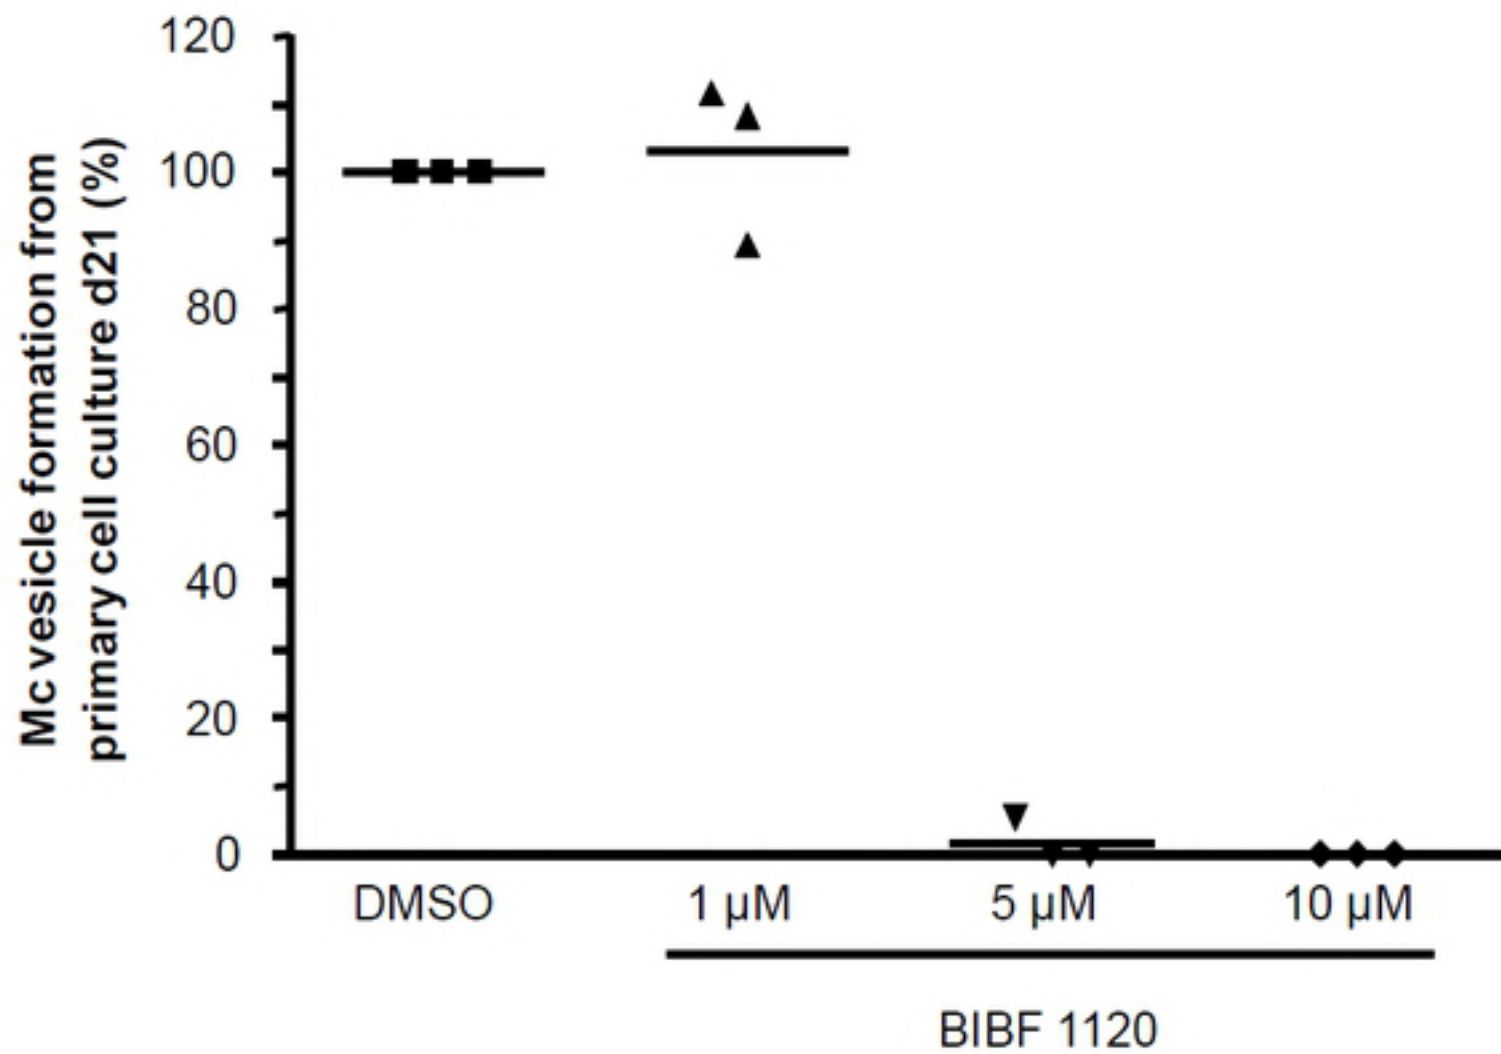

Figure 6

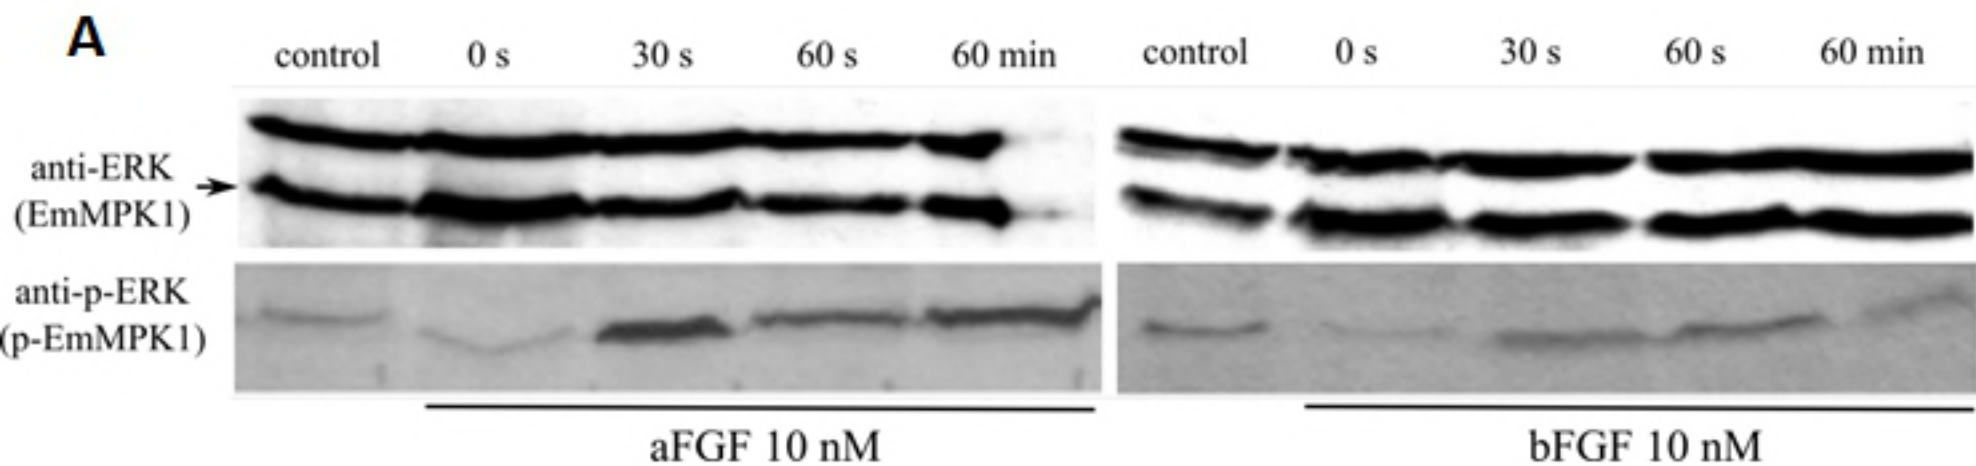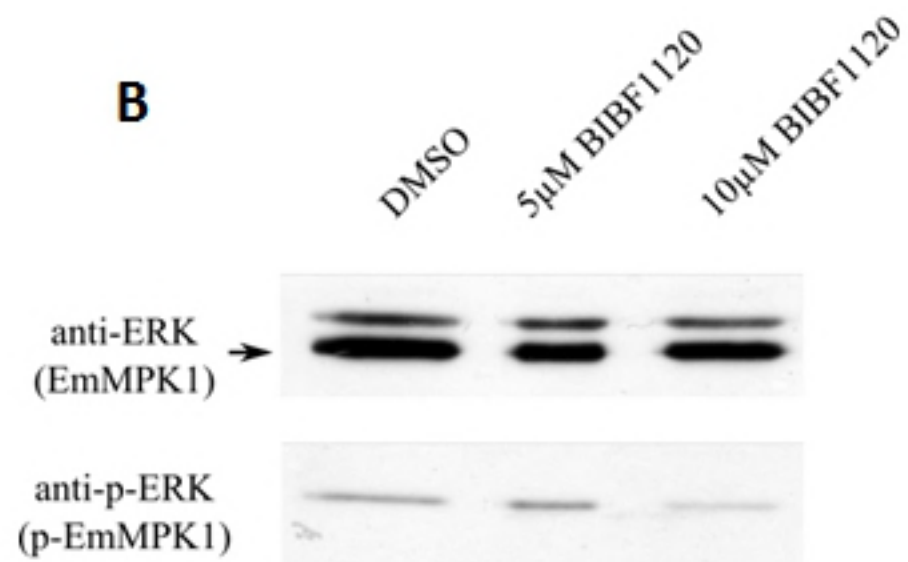

Figure 7
